**Title: High-Throughput Functional Evaluation of *BRCA2* Variants of Unknown**

**Significance**

**Authors:** Masachika Ikegami<sup>1,2</sup>, Shinji Kohsaka<sup>1</sup>, Toshihide Ueno<sup>1</sup>, Yukihide Momozawa<sup>3</sup>, Kenji Tamura<sup>4</sup>, Akihiko Shimomura<sup>4</sup>, Noriko Hosoya<sup>5,6</sup>, Hiroshi Kobayashi<sup>2</sup>, Sakae Tanaka<sup>2</sup>, and Hiroyuki Mano<sup>1</sup>

**Affiliations:**

<sup>1</sup>Division of Cellular Signaling, National Cancer Center Research Institute, Tokyo, Japan

<sup>2</sup>Department of Orthopaedic Surgery, Faculty of Medicine, The University of Tokyo, Tokyo, Japan

<sup>3</sup>Laboratory for Genotyping Development, RIKEN Center for Integrative Medical Sciences, Kanagawa, Japan

<sup>4</sup>Department of Breast and Medical Oncology, National Cancer Center Hospital, Tokyo, Japan

<sup>5</sup>Department of Medical Genomics, Graduate School of Medicine, The University of Tokyo, Tokyo, Japan

<sup>6</sup>Laboratory of Molecular Radiology, Center for Disease Biology and Integrative Medicine, Graduate School of Medicine, The University of Tokyo, Tokyo, Japan.

**Running title:** High-throughput functional evaluation of *BRCA2* variants

**Keywords:** *BRCA2*, poly(ADP-ribose) polymerase (PARP) inhibitor, variants of unknown significance (VUSs), companion diagnosis, Bayesian hierarchical model

**Corresponding author:**

Shinji Kohsaka and Hiroyuki Mano

5-1-1 Tsukiji, Chuo-ku, Tokyo, Japan, 104-0045

Phone: +81-3-3547-5201

Fax: +81-3-5565-0727

E-mail: [skohsaka@ncc.go.jp](mailto:skohsaka@ncc.go.jp) (SK) or [hmano@ncc.go.jp](mailto:hmano@ncc.go.jp) (HM)

**Financial support:** This study was supported by the World-leading Innovative Graduate Study Program for Life Science and Technology, The University of Tokyo, as part of the WISE Program (Doctoral Program for World-leading Innovative & Smart Education), MEXT, Japan; grants from the Program for Integrated Database of Clinical and Genomic Information under grant number JP18kk0205003, the Leading Advanced Projects for Medical Innovation (LEAP) under grant number JP18am0001001, and the Practical Research for Innovative Cancer Control under grant number JP18ck0106252 from the Japan Agency for Medical Research and Development, AMED; a grant for Endowed Department (Department of Medical Genomics, Graduate School of Medicine, The University of Tokyo) from Eisai Co., Ltd.

**Conflict of Interest Statement:** The authors certify that no actual or potential conflict of interest in relation to this article exists.

## ABSTRACT

Numerous nontruncating missense variants of the *BRCA2* gene have been identified, but there is a lack of convincing evidence, such as familial data, demonstrating their clinical relevance and they thus remain unactionable. To assess the pathogenicity of variants of unknown significance (VUSs) within *BRCA2*, we developed a novel method, the MANO-B method, for high-throughput functional evaluation utilizing *BRCA2*-deficient cells and poly(ADP-ribose) polymerase (PARP) inhibitors. The estimated sensitivity and specificity of this assay compared to those of the International Agency for Research on Cancer (IARC) classification system were 95% and 95%, respectively. We classified the pathogenicity of 186 *BRCA2* VUSs with our original computational pipeline, resulting in the classification of 126 mutations as “neutral/likely neutral”, 23 as “intermediate”, and 37 as “deleterious/likely deleterious”. We further invented a simplified, on-demand annotation system, the Accurate BRCA Companion Diagnostic (ABCD) test, as a companion diagnostic for PARP inhibitors in patients with unknown *BRCA2* VUSs. The ABCD test classification was reproducible and consistent with that of a large-scale MANO-B method.

## INTRODUCTION

The *BRCA1* and *BRCA2* (*BRCA*) genes encode key proteins in the homology-directed DNA break repair (HDR) pathway, and their inactivation predisposes individuals to cancer development<sup>1</sup>. Germline loss-of-function variants in *BRCA* markedly increase the risk of early-onset breast and ovarian cancer; in such cases, prophylactic oophorectomy and mastectomy and genetic testing for at-risk relatives must be considered<sup>2, 3, 4</sup>. Tumors with pathogenic mutations within *BRCA* and defective HDR have been shown to be particularly sensitive to platinum-based chemotherapies and PARP inhibitors, the efficacy of which is mediated through synthetic lethality in cancer cells with *BRCA* loss-of-function<sup>5, 6</sup>.

The American College of Medical Genetics and Genomics (ACMG) standards and guidelines for the interpretation of sequence variants recommend a process for variant classification based on criteria using population, computational, functional, and segregation data<sup>7</sup>. Family-based studies including a multifactorial model of pathology, a cosegregation profile, and the cooccurrence and family history of cancer may exemplify the most reliable methods for classifying *BRCA2* gene variants<sup>8, 9</sup>. Nonsense or frameshift mutations within the coding exons of *BRCA* markedly alter the structures of the protein products and are presumed to confer loss-of-function. However, the vast majority of missense variants are individually rare in both general populations and cancer patients, and case-control studies may not have sufficient statistical significance to classify these variants as pathogenic or benign<sup>10, 11, 12</sup>. No current *in silico* computational prediction algorithm for missense variants is accurate enough when used alone<sup>13</sup>. Thus, the functional evaluation of missense variants of unknown significance (VUSs) is urgently required to improve the interpretation of variants identified by genetic testing and to support clinical decision-making for their carriers<sup>14</sup>.



While thousands of *BRCA1* VUSs have been assessed by recently developed high-throughput functional assays<sup>15,16,17</sup>, a few hundred *BRCA2* variants have been evaluated by a conventional functional assay for *BRCA2*, the HDR assay<sup>18,19</sup>. The HDR assay has three issues requiring improvement: (i) the throughput is quite low, (ii) it uses a hamster cell line with transient expression of *BRCA2* cDNA, and most importantly, (iii) it can evaluate only variants in the DNA-binding domain<sup>14,20</sup>. To overcome these limitations, we propose herein a high-throughput method using a human cell line stably expressing *BRCA2* variants that enables the evaluation of all exonic variants of the *BRCA2* gene.

## RESULTS

### Stable transduction of *BRCA2* variants into DLD1 *BRCA2* ( $-/-$ ) cells

The introduction and stable expression of *BRCA2* variants in human cells is technically difficult owing to the relatively large coding sequence of this gene (10.2 kbp)<sup>14</sup>. We addressed this issue by employing a piggyBac transposon vector suitable for the stable introduction of large DNA sequences into the genome<sup>21</sup>. In addition, we utilized a *BRCA2* knockout human colorectal adenocarcinoma cell line, DLD1 *BRCA2* ( $-/-$ ), which is known to be highly sensitive to PARP inhibition compared to parental cells retaining *BRCA2*<sup>22, 23</sup>. If a *BRCA2* missense variant is further introduced into DLD1 *BRCA2* ( $-/-$ ) cells, the change in PARP inhibitor sensitivity likely reflects the function of the introduced variant. For instance, the expression of a neutral variant in DLD1 *BRCA2* ( $-/-$ ) cells should restore HDR and thus resistance to PARP inhibitors.

Initially, a total of 107 *BRCA2* variants were selected from a curated database, the BRCA Exchange<sup>24</sup> (**Supplementary Table 1**). Of these, 32, 10, and 65 variants were classified as benign (Class 1/2), pathogenic (Class 4/5), and VUSs (Class 3), respectively, according to the multifactorial five-tier classification system developed by the International Agency for Research on Cancer (IARC)<sup>10, 11, 18, 25, 26</sup>. These *BRCA2* variant cDNAs were generated by site-directed mutagenesis and were then subcloned into the piggyBac vector containing unique 10 bp DNA barcode sequences. These individual piggyBac plasmids, together with the hyPBase transposase expression vector, were transfected into DLD1 *BRCA2* ( $-/-$ ) cells<sup>27</sup>.

The transduction efficiency for 20 selected variants was evaluated by real-time quantitative reverse transcription PCR (qRT-PCR) and digital droplet PCR (**Supplementary Fig. 1A, B and Supplementary Table 2**). The mRNA expression levels were within the physiological

range of endogenous *BRCA2* with no significant difference among the variants, whereas the copy numbers of the integrated *BRCA2* cDNA were approximately 10. Western blotting demonstrated that the protein expression levels of the 19 *BRCA2* variants were generally equal to that of wild-type *BRCA2* (**Supplementary Fig. 1C**).

## **Establishment of MANO-B method**

We next performed a cell viability assay to evaluate the drug sensitivity of the *BRCA2* variants. Cells treated with PARP inhibitors (olaparib, niraparib, and rucaparib) or carboplatin (CBDCA) at various concentrations for 6 d were assessed with PrestoBlue reagent (**Supplementary Fig. 2 and Supplementary Table 2**). Wild-type *BRCA2* and benign variants showed greater tolerance to these drugs than pathogenic variants. However, the threshold between the benign and pathogenic variants was unclear. It is important to note that wild-type *BRCA2*-induced cells were significantly more sensitive than parental DLD1 cells; therefore, we should establish a sensitive method in which all comparisons could be made with wild-type-induced cells rather than parental cells. We thus modified the mixed-all-nominated-in-one (MANO) method<sup>28, 29</sup> that was originally developed to enable high-throughput evaluation of VUSs in transforming genes and invented the MANO-*BRCA* (MANO-B) method for the functional evaluation of *BRCA2* variants (**Fig. 1**).

In the MANO-B method, DLD1 *BRCA2* (−/−) cells were transfected with the individual *BRCA2* variant cDNAs and the variant-specific barcodes, mixed, and cultured with or without drugs. Genomic DNA was extracted from each cell mixture after the drug treatments, and the barcode sequences were amplified by PCR and deep sequenced. The barcode read count, which was linearly correlated to the number of viable cells harboring the corresponding variant<sup>28</sup>,

was normalized to that of the vehicle control to evaluate the relative cell viability. Based on these profiles, the drug sensitivity and pathogenicity of each variant were determined (**Fig. 1**).

# **MANO-B method of 107 *BRCA2* variant analysis using PARP inhibitors and CBDCA**

We performed the MANO-B method using the 107 variants with various concentrations of four drugs. The difference in drug sensitivity among the variants was clearly demonstrated at high drug concentrations (**Fig. 2 and Supplementary Table 3**), and the optimal concentrations were thus determined to be 2.0, 0.5, 2.0, and 2.0  $\mu$ M for olaparib, niraparib, rucaparib, and CBDCA, respectively.

The relative viability of the cells treated with each drug was first calculated by comparing the viability with that of vehicle-treated cells, then normalized to that of cells expressing wild-type *BRCA2*. All variants were sorted by relative viability at the optimal concentrations. A scatter plot of the relative viability of olaparib and the other three drugs revealed an intermediate group including the P2329L, P2639L, D2913H, and S3291C mutants between the benign and pathogenic groups (**Supplementary Fig. 3 and Supplementary Table 3**). With this intermediate group as a boundary, all known pathogenic variants showed lower relative viability, whereas all but two known benign variants—R2842H and V2908G—showed higher relative viability. The two variants were indeed shown to be hypomorphic by HDR assay in a previous study<sup>18</sup>. In addition, we found that one likely pathogenic variant (N3187K) defined by ClinVar exhibited neutral function as evaluated by the MANO-B method. This discordance between the functional classification and the clinical classification suggests potential errors in the clinical annotations for rare variants.

We believe that the discrepancy in the classification of IARC Class 1/2 variants (R2842H and V2908G) that were evaluated as fClass 3 and fClass 4, respectively, using the MANO-B method with niraparib was because of the unreliable evidence which the IARC criteria was based on. The IARC classification is based on epidemiological evidence such as cosegregation data and other family-based genetic analyses <sup>10</sup>. According to the Genome Aggregation Database, both R2842H and V2908G (minor allele frequency =  $6.34 \times 10^{-5}$  and  $1.69 \times 10^{-5}$ ) were rare variants. Therefore, it might be difficult to obtain solid evidence for these variants. To assess the pathogenicity of such variants accurately, the classification method must be based on a wide variety of evidence. Therefore, we reinterpreted all the 59 Class 1/2/4/5 variants (37 benign and 22 pathogenic) used in the MANO-B method according to the ACMG 2015 guidelines as previously described (Supplementary Table 1) <sup>26,30</sup>. As a result, 18 variants (31%), including R2842H and V2908G, were classified into VUSs because of insufficient evidence (Supplementary Table 1). Furthermore, N3187K, defined as a likely pathogenic variant by ClinVar, is also defined as VUS according to both IARC and ACMG criteria. The criteria of the ACMG guidelines are more conservative and stringent than those of other classification methods because ACMG uses multiple criteria from different points of view and perspectives <sup>7</sup>. This discrepancy among clinical databases implies potential errors in the interpretation of clinical variants. Moreover, the IARC and ACMG classification methods were designed for detecting high-risk pathogenic variants, and therefore, hypomorphic function variants or moderate cancer risk variants could be classified inappropriately <sup>25</sup>. Hence, we regard the discrepancy between functional and epidemiological evidence as reasonable.

To evaluate the evenness of the pooled variant ratio, we collected cell pellets at day 0 (the day the drug treatment was started) to count the barcode reads by MiSeq. Regarding the raw data obtained from batch #1, the minimum, maximum, and median read counts were 778, 13,294,

and 5,763 for N55S, R3385H, and Y3098H, respectively. The distribution of each variant ratio is shown as a histogram (**Supplementary Figure 4A**). A total of 97 variants (90%) were within the range of 0.5–2-fold average. We also calculated the fold change from day 0 to day 12 with DMSO (dimethyl sulfoxide) treatment (**Supplementary Figure 4B**). The majority of cells expressing these variants generally exhibited a uniform growth, and the functions of the induced *BRC42* variants did not have much impact on cell growth. The unevenness of the variant ratio probably has a small effect on the result of the MANO-B method because this method is based on fold-change calculation and the abundance bias is corrected through analysis.

#### **Evaluation of 244 *BRC42* variants by applying Bayesian inference to MANO-B method**

We expanded the experiment to encompass 244 variants, including 186 VUSs, at the optimal concentration of each drug, and obtained an assay dataset comprising 7,344 individual viability values (**Supplementary Tables 1 and 3**). Using the optimal threshold for receiver operating characteristic (ROC) analysis, the estimated sensitivity and specificity of the MANO-B method for variant pathogenicity compared with those of the IARC classification system were 100% and 95%, respectively (**Supplementary Fig. 5**).

Given that the existence of intermediate variants was suggested, a new nondichotomous mathematical approach was explored to precisely determine the pathogenicity of each variant. Relative viability data were log normalized and compensated using the values of the wild-type and the D2723H variant as standard values for benign and pathogenic variants, respectively. The resulting viability data followed a two-component Gaussian mixture model by the expectation–maximization algorithm (**Supplementary Fig. 6**).

In the following analysis, we adopted the Bayes factor (BF) as the strength of evidence in favor of pathogenicity. To calculate the BF, we utilized a Bayesian hierarchical two-component Gaussian mixture model based on the VarCall model<sup>18, 31, 32</sup> with a noninformative prior probability. In this setting, the BFs were calculated as the probability ratio of a variant being deleterious to it being neutral. A five-tiered functional classification based on the BF was assigned to each variant according to established criteria consistent with the ACMG variant evaluation guidelines as follows<sup>33</sup>: fClass 1 (neutral;  $BF \leq 0.003$ ), fClass 2 (likely neutral;  $0.003 < BF \leq 0.053$ ), fClass 3 (intermediate;  $0.053 < BF < 18.7$ ), fClass 4 (likely deleterious;  $18.7 \leq BF < 350$ ), or fClass 5 (deleterious;  $350 \leq BF$ ). Under this definition, fClass 5 can be regarded as extremely strong evidence of pathogenicity in the framework of the ACMG guidelines.

The function of a variant,  $v$ , was estimated by a variant-specific effect,  $\eta_v$ . Using 22 known pathogenic and 37 known benign variants as the training set, the  $\eta_v$  values of benign and pathogenic variants were gradually distributed (**Supplementary Fig. 7**). The sensitivity and specificity of the Bayesian inference for detecting IARC class 4/5 variants were 95% and 95%, respectively. We also analyzed the concordance between the ACMG classification and the MANO-B classification. All the 41 benign/pathogenic variants (22 benign and 19 pathogenic) used in the MANO-B method were clearly divided into two groups (Supplementary Figure 8).

To validate the BF-based classification from the functional perspective, we set two functional classification thresholds determined by the ACMG benign/pathogenic variants to classify the following three components according to a previous report: neutral, intermediate, and deleterious<sup>15, 18</sup>. The higher threshold between neutral and intermediate components is defined as the minimal effect of benign variants according to the ACMG criteria (R18H,  $\eta = -1.38$ ),

whereas the lower threshold between intermediate and deleterious components is defined as the maximal effect of pathogenic variants (C2535X truncate variant,  $\eta = -2.17$ ). As a result, all the functional effects of fClass 1/2 variants were above the higher threshold, whereas all those of fClass 4/5 variants were below the lower threshold. Now, fClass 4/5 variants can be regarded as pathogenic because their probability is in the deleterious component and their functional levels are equivalent to those of the known pathogenic variants.

Notably, the fClass values of the individual variants for the four drugs were concordant (**Fig. 3 A–C**). The data for 0.5  $\mu$ M niraparib exhibited the highest resolution in the evaluation of the variants of intermediate function. We assume that the difference in functional estimation among drugs in the MANO-B method was primarily because the drug concentrations of olaparib and rucaparib were not as optimal as that of niraparib. The concentration of 2.0  $\mu$ M of olaparib, rucaparib, and CBDCA was probably too high for DLD1 cells expressing hypomorphic variants to survive, considering that the cell viability assay with 1  $\mu$ M of olaparib, rucaparib, and carboplatin (shown in Supplementary Figure 2B) demonstrated broader transitional zones between benign and pathogenic variants. Among the 186 VUSs analyzed in the full dataset with niraparib, 98, 28, 23, 6, and 31 variants were classified as fClass 1 to 5, respectively (**Fig. 3D, Supplementary Table 3**). All variants outside functional domains belonged to fClass 1/2. Most deleterious variants were located in the DNA-binding domain (DBD). Other deleterious variants were W31C/G/L in the transactivation domain (TAD)<sup>34</sup>, P2329L in the MEILB2-binding domain (MBD)<sup>35</sup>, and S3291C in the C-terminal domain (CTD), which is a key phosphorylation site for BRCA2-RAD51 interaction<sup>22</sup>.

This Bayesian model allowed a combinational classification based on log-normalized relative viability data with prior probability, such as the Align-GVGD classification based on the



evolutionary conservation and biophysical properties of amino acids <sup>36</sup> (**Supplementary Fig. 9**). However, this combinational classification for variants outside the DBD should be interpreted with caution because no reliable prior probability data have been established for this region.

## **Model validation**

The internal validation of our model was confirmed by posterior predictive checks. The posterior predictive distribution of the log-normalized relative viability matched the observed data (**Supplementary Fig. 10A**). Quantile-Quantile (Q-Q) plots showed that the posterior expected standardized residuals of relative viability exhibited a normal distribution (**Supplementary Fig. 10B**). Furthermore, a strong correlation between the MANO-B method and the HDR assay for 24 selected variants was confirmed (**Supplementary Fig. 11 and Supplementary Table 2**). The results of the two assays revealed a small discordance in some variants. The S3291C variant exhibited a relatively high value in the HDR assay compared to that in the MANO-B method, probably because S3291 is the phosphorylation site for CDK1/2 and the HDR assay cannot evaluate its function exactly <sup>37</sup>.

## **Development of Accurate BRCA Companion Diagnostic (ABCD) test**

To rapidly evaluate the pathogenicity of *BRCA2* VUSs in the clinic, the Accurate BRCA Companion Diagnostic (ABCD) test was developed as a potential companion diagnostic for PARP inhibitor treatment. Newly detected *BRCA2* cDNAs, along with four control variants for benign (wild-type and T2515I) and pathogenic (Y2660D and D2723H) mutations, were generated for assessment by a small-scale MANO-B method. The resulting data correlate with the data from previous MANO-B experiments, enabling batch effect adjustment for pathogenicity determination. When a *BRCA2* VUS is believed to be related to splicing

aberration, its mRNA should be evaluated by RNA sequencing of patient samples<sup>38</sup>. Any aberrant *BRCA2* transcripts detected should also be subjected to the ABCD test (**Fig. 4**).

An experiment was designed to confirm the accuracy of the ABCD test, in which I1929V, D3095E, Y3035S, and S3291C were assessed as if they were novel variants. The classification of neutral and deleterious variants was almost reproducible and consistent with that observed for previous large-scale batches; however, the classification of the D3095E pathogenic variant in batch #1 was underdiagnosed (from fClass5 to fClass4, **Table 1**). One misclassification is crucial in case we judge the clinical application based on the result of a single batch. Because transfection efficiency might cause inconsistent results in the ABCD test, we recognized the importance of multiple independent transfections using different batches of mutants to ensure the accuracy of the assay. Therefore, we combined the results from three batches with different transfections and performed a statistical analysis to annotate the pathogenicity. This approach improved the consistency (4/4, 100%) between the ABCD test and the large-scale MANO-B method, although the validation study remains to be performed in a larger scale.

## DISCUSSION

Several functional assays for *BRCA2* variants have been developed to date based on the various functions of BRCA2 protein. However, it should be noted that loss of a certain function does not directly lead to cancer predisposition. For example, an established R3052W pathogenic variant did not show pathogenicity in the centrosome amplification assay<sup>39</sup>, whereas G2353R, once annotated as a benign variant, showed a pathogenic response in the spontaneous homologous recombination assay<sup>40</sup>. The results of each functional assay should be carefully interpreted together with clinical genetic data.

It is remarkable that the distribution of the functional parameter  $\eta_v$  for the MANO-B method was continuous from the neutral to the deleterious component and not clearly segregated into two components, in accordance with the HDR assay<sup>18</sup>, suggesting the existence of variants of intermediate function<sup>41</sup>.

For the nondichotomous classification, a high-resolution quantitative assay together with an appropriate inference method are necessary. In the MANO-B method, all cell clones with individual variants are evenly mixed and cultured in one dish. Since each clone grows competitively under the same culture conditions, including pH, temperature, and drug concentration, we can minimize the technical error and bias and evaluate even small differences in BRCA function among the variants. This is a great advantage over other methods such as the cell viability assay and the HDR assay, which test variants individually.

Recently, Findlay *et al.* reported a robust saturation genome editing method by the use of a haploid cell line, HAP1, that depends on the HDR pathway for growth<sup>15</sup>. In contrast to the MANO-B method, their technology may accurately evaluate the function of variants at the

splicing sites or the promoters of *BRCA* genes. On the other hand, our method uses a diploid cell line and, therefore, may better reflect HDR function in physiological conditions. The MANO-B method is, further, able to directly interrogate the sensitivity of each VUS to different PARP inhibitors. The MANO-B method and the saturation genome editing method may thus be complementary to each other.

While clinical gene testing has identified plenty of *BRCA2* mutations, most VUSs are rare and thus there is a lack of substantial familial data. Recently, the uncommon (but not rare) variants G2508S (IARC Class 4) and Y3035S (IARC Class 2) were reported in a large case–control study showing indecisive cancer predisposition<sup>18, 41</sup>. These two variants demonstrate the clinical utility of the MANO-B method for clinical annotation of VUSs well. G2508S ( $\eta_v = -2.42$ , fClass 4) showed hypomorphism, while Y3035S ( $\eta_v = -0.63$ , fClass 1) showed neutral function, although the possibility of splicing aberration by the c.9104A>C single nucleotide variation was not excluded. We consider that G2508S is a hypomorphic variant because the familial data is consistent with the functional result, whereas the pathogenicity of Y3035S is indeterminate because of the conflict among the data. The clinical annotation of such uncommon variants could be assessed by a combinational approach, although additional clinical data are needed to identify the optimal thresholds for the MANO-B method. It is not yet known how to deal with patients harboring *BRCA2* hypomorphic variants. However, we believe these patients are probably eligible for PARP inhibitor treatment. Judging in combination with *BRCA*ness assessment is a good option to predict the effectiveness of PARP inhibitors.

Overall, the MANO-B method is a robust and scalable analysis approach for evaluating the function of *BRCA2* variants. As we developed a dataset of 244 *BRCA2* variants, including

controls, additional independent analysis can be merged for precise evaluation using batch effect compensation. Importantly, this technique is applicable to the high-throughput functional assessment of other tumor suppressor genes, augmenting the functional data for rare variants and identifying the association of these variants with cancer susceptibility.

Furthermore, we propose the ABCD test as a companion diagnostic for PARP inhibitor treatment in patients newly identified as *BRCA2* VUS carriers. There are two scenarios in which the result of the MANO-B method can be applied to patients in the framework of the ACMG guidelines; one is for predicting the effectiveness of PARP inhibitors for patients with cancer harboring *BRCA2* VUSs, and the other is for considering prophylactic surgery to prevent cancer in patients who at the time are healthy. In the former scenario, clinicians should promptly decide on the usage of PARP inhibitors for patients with cancer harboring *BRCA2* VUSs to prevent tumor progression. Therefore, a rapid evaluation of *BRCA* function using the ABCD test could be a companion diagnostic method for PARP inhibitor treatment, although the clear threshold of fClass as a marker to predict which variant is actually beneficial for PARP inhibitor treatment in the clinical setting should be determined by clinical trials. In the latter scenario, healthy patients with hereditary *BRCA2* VUSs can wait and observe for several years for the tumor to emerge. After receiving genetic test results, approximately half of the women wait more than 12 months before undergoing prophylactic salpingo-oophorectomy<sup>42</sup>. The application of prophylactic surgery should be considered carefully along with genetic counseling because it is irreversible and the patient does not have any life-threatening illness at the moment. The penetration rate of cancer likely depends on the extent of *BRCA* function deficiency; healthy patients with a *BRCA* variant of fClass 3 or 4 might be referred to careful check-up rather than prophylactic surgery.

Tumor response to PARP inhibitor therapy has several biomarkers other than *BRCA1/2* inactivation, such as EMSY amplification, Fanconi anemia pathway inactivation, and other HR gene defects<sup>43</sup>. Therefore, it is a good method to evaluate “*BRCAness*” by whole-genome sequencing of tumors based on mutation and rearrangement signatures without the knowledge of the precise causative mutations<sup>44, 45</sup>. Nones *et al.* demonstrated that 21 breast cancers from 22 *BRCA2* pathogenic mutation carriers (95%) in the study exhibited “*BRCAness*,” whereas only one was *BRCA*-proficient<sup>45</sup>. In contrast to the test of *BRCAness*, the ABCD test is a simple functional method for evaluating *BRCA2* variant pathogenicity. Although the ABCD test cannot explain the *BRCAness* of non-*BRCA1/2* tumors, it is a rapid and precise method that directly evaluates the PARP inhibitor sensitivity of cancers harboring *BRCA2* VUSs. In addition, an advantage of the ABCD test over *BRCAness* analysis is that the ABCD test can evaluate whether germline *BRCA* variants found in people without cancer are pathogenic variants predisposing to cancer. We believe that both the ABCD test and the whole-genome sequencing of tumors can be used in parallel for the assessment of “*BRCAness*.” As the ABCD test reported in this study was limited to *BRCA* functional analysis, we sought to apply this test to other HR genes in the next study.

There are several limitations regarding the use of the MANO-B method for clinical annotation. The MANO-B method evaluates HDR function of *BRCA2* variants via PARP inhibitor sensitivity and estimates their pathogenicity indirectly. This method does not directly consider other *BRCA2* functions, such as the regulation of the G2–M transition or transcriptional elongation<sup>46, 47</sup>. Although the high concordance of the MANO-B method with the IARC and ACMG classifications suggest that *BRCA2* pathogenicity can be evaluated primarily by investigating HDR activity, we would like to note that BFs for deleteriousness do not have a direct correlation with the likelihood ratios for pathogenicity, as the “neutral” or “deleterious”

variants defined by this functional assay are not necessarily “benign” or “pathogenic” variants in the clinical setting. The pathogenicity of a variant should be evaluated in a comprehensive framework such as the ACMG guidelines. Another limitation of our cDNA-based assay is that this approach cannot rule out potential effects on splicing. Importantly, although there are some computational predictors for possible splicing aberrations, either algorithms could not demonstrate adequate reliability for clinical usage, especially for mutations outside of the consensus splice sites<sup>48</sup>. Comprehensive splicing functional assays such as hybrid minigene assay and saturation genome editing technique would reinforce the evidence<sup>15, 49, 50</sup>. It is also recommended to perform RNA-seq of patient blood and tumor to detect aberrantly spliced mRNA. In addition, the MANO-B method was performed in this study using only one cell line, and it is unclear whether the result of the MANO-B method is reproducible in other cell lines. To evaluate the variant functions precisely and robustly, replication studies with multiple cell lines with various homologous recombination statuses are desired.

We believe that the MANO-B method will lead to a better understanding of cancer biology and provide a new concept of clinical functional annotation to improve cancer diagnosis and treatment.

## METHODS

### Cell lines and culture conditions

Human colorectal adenocarcinoma cell line DLD1 parental cells and homozygous *BRCA2* (-/-) variant cells were purchased from Horizon Discovery, Inc. Cells were cultured in RPMI 1640 medium containing 10% fetal bovine serum and 2 mM L-glutamine at 37 °C in 5% CO<sub>2</sub> and passaged at 70–90% confluency with 0.05% TrypLE Express (all from ThermoFisher Scientific).

### Choice of variants

A total of 239 *BRCA2* missense variants identified in the BRCA Exchange database were selected. Sequence nomenclature was based on Human Genome Variant Society (HGVS) and National Center for Biotechnology Information (NCBI) reference NP\_000050.2: p.V2466A. We randomly selected 155 variants from functional domains and an additional 89 variants outside functional domains from throughout the coding sequence. Variants in functional domains were selected considering Align-GVGD in silico prediction. Between 14 and 19 VUSs were randomly selected from each of the five Align-GVGD C15–C55 categories, and 62 variants were randomly selected from the C65 category. The proportion of each category was defined as previously reported<sup>18</sup>. An additional 5 nonsense variants thought to be definitely pathogenic were selected as controls (**Supplementary Table 1**). Eight VUSs located in the last 3 exonic bases of the splice donor site and 5 VUSs located in the first 2 exonic bases of the splice acceptor site were possible candidates for disrupting splice consensus sequences. These VUSs were analyzed using Splicing Prediction in Consensus Element (SPiCE)<sup>48</sup>, the most accurate in silico splice site prediction algorithm for *BRCA1/2*. Only 6 variants—V159M (c.475G>A), D23Y (c.67G>T), V211I (c.631G>A), R2336P (c.7007G>C), and R2602T



(c.7805G>C)—were predicted to alter canonical splicing, and we assessed the effect of these variants on protein function by the MANO-B method (**Supplementary Table 3**).

## Plasmid construction

The piggyBac transposon vector was constructed by inserting a random 10-bp DNA barcode sequence between the CMV promoter and the multiple cloning site of the piggyBac dual promoter vector (PB513B-1; System Biosciences). The GFP sequence in the piggyBac vector was deleted by a site-directed mutagenesis technique for the direct repeat–green fluorescent protein (DR-GFP) assay. The full-length wild-type cDNA of human *BRCA2* was subcloned from pcDNA3 236HSC WT (Addgene plasmid # 16246) into the piggyBac vector. Plasmids encoding *BRCA2* mutations were developed by a site-directed mutagenesis technique with mutation-specific primers designed using an online tool (QuikChange Primer Design; <https://www.agilent.com/store/primerDesignProgram.jsp>). The primers used for mutagenesis are listed in **Supplementary Table 1**. For western blot analysis, the N-terminal FLAG-tag (DYKDDDDK) was inserted in the piggyBac-*BRCA2* wild-type by site-directed mutagenesis, and then the 19 *BRCA2* variants were also subcloned into the FLAG-*BRCA2*-piggyBac vector. Plasmids were fragmented by an E220 Focused-ultrasonicator (Covaris, Inc.) to an average size of 300 bp, ligated with adaptors, and sequenced using MiSeq (Illumina). All the entire *BRCA2* cDNA sequences, including the ones with point mutations generated by site-directed mutagenesis, the unique barcode sequences, and the piggyBac vector backbone sequences of every plasmid were confirmed by our original pipeline. Next-generation sequencing (NGS) data were aligned by Bowtie2 against the reference sequence composed of wild-type *BRCA2* cDNA and the piggyBac vector and analyzed with IGV 2.4.10 software (Broad Institute). Plasmids harboring undesirable mutations were discarded. Therefore, all plasmids in this study had only target mutations and unique barcode sequences without additional mutations. The

hyperactive piggyBac transposase expression vector (pCMV-hyPBase) was provided by Trust Sanger Institute. pCBASceI and pHPRT-DRGFP were a gift from Maria Jasin (Addgene plasmid # 26477 and # 26476, respectively). The puromycin antibiotic selection marker for pHPRT-DRGFP was replaced with the Sh<sub>ble</sub> zeocin resistance gene. To construct the piggyBac-DRGFP vector, the ends of the XhoI-SacI-digested DRGFP reporter fragment and the SpeI-ApaI-digested piggyBac transposon vector were blunted and ligated to each other.

### **Stable transfection with the piggyBac transposon**

The lipid-based method was used to transfect DLD1 cells with the plasmid constructs. Transfections were performed with exactly one unique plasmid per well. This is essential to guarantee that cells were transduced with only one variant. The same clone of each plasmid harboring a variant was used for all independent batches. Twenty-four hours before transfection, Cells were seeded in 96-well plates at a density of  $1 \times 10^4$  cells/well. Prior to transfection, the culture medium was replaced with 100  $\mu$ l of fresh medium. The transfection mixture for individual wells comprised 100 ng of the piggyBac transposon vector, 50 ng of pCMV-hyPBase, 0.5  $\mu$ l of Lipofectamine Stem Transfection Reagent (Thermo Fisher Scientific), and 50  $\mu$ l of Opti-MEM I Reduced Serum Medium (Thermo Fisher Scientific). The transfection mixture was added to each well after 20 minutes of incubation at room temperature. Two days after transfection, cells were cultured with antibiotics (3  $\mu$ g/ml puromycin for piggyBac-*BRCA2* and 100  $\mu$ g/ml zeocin for piggyBac-DRGFP) for 7 days. Puromycin-resistant polyclonal cell populations harboring piggyBac-*BRCA2* were used directly for assays, while a genetically homogeneous cloned cell line harboring piggyBac-DRGFP was generated from a single cell.

### **Digital droplet PCR**

Digital droplet PCR was performed using a QX100 Droplet Digital PCR system (Bio-Rad Laboratories) with *BRCA2* cDNA primers and probe and *BRCA2* intron primers and probe, both at a final concentration of 900 nM primers and 250 nM probe. The sequences are shown in **Supplementary Table 2**. Aqueous droplets with a 20- $\mu$ l volume containing final concentrations of 1 $\times$  Droplet Digital PCR Supermix for probes (Bio-Rad Laboratories) and 100 ng of the genomic DNA template were generated. PCR amplification was conducted using a T100 Thermal Cycler under the manufacturer-recommended conditions. After amplification, the digital PCR data were collected and analyzed using a Bio-Rad QX100 droplet reader and QuantaSoft v1.3.2.0 software. Crosshair gating was used to automatically split the data into four quadrants by the software's normal setting. Approximately 15,000 droplets were analyzed per well. The induced *BRCA2* cDNA copy number was calculated based on the observation that DLD1 cells are a pseudodiploid human cell line and the copy number of the endogenous *BRCA2* gene is considered to be 2. The 95% confidence intervals were estimated by a Poisson distribution model.

### **Real-time quantitative RT-PCR**

Freshly recovered DLD1 *BRCA2* (-/-) cells with 20 variants of *BRCA2*, untransduced DLD1 *BRCA2* (-/-) cells, and DLD1 parental cells were pelleted. Total RNA was extracted from these pellets with RNA-Bee reagent following the manufacturer's instructions. DNase I digestion was performed to minimize DNA contamination, and RNA-Bee purification was repeated to inactivate DNase I. The reverse transcription reaction used 1  $\mu$ g of total RNA from each sample with SuperScript IV VILO reverse transcriptase. The resulting cDNAs were subsequently used for two-step quantitative RT-PCR with Power SYBR Green PCR Master Mix (Thermo Fisher Scientific) on a 7500HT Fast Real-Time PCR System (Thermo Fisher Scientific). The primers specific for *BRCA2* exon 11 and ACTB are shown in **Supplementary Table 2**. The amplified

*BRCA2* sequence was present in parental cells but absent from *BRCA2* (-/-) cells; therefore, mRNA detected in the *BRCA2* (-/-) cells was derived from induced cDNA. The relative *BRCA2* expression levels were normalized to the expression levels of the housekeeping gene ACTB. Experiments were performed in technical triplicate, including DLD1 parental cells and DLD1 *BRCA2* (-/-) cells transfected with empty vector control. Then, the expression data were further normalized to the corresponding expression levels in DLD1 parental cells. The results are shown as the averages of biological triplicate experiments.

### **Western blotting**

Whole-cell lysates from DLD1 *BRCA2* (-/-) cells harboring 20 variants of the N-terminal FLAG-tagged *BRCA2* cDNA and the empty piggyBac vector were prepared with sodium dodecyl sulfate (SDS) sample buffer containing 2-mercaptoethanol (Nacalai tesque). Total protein (70 µg/sample for FLAG-BRCA2 and 10 µg/sample for beta-Actin) obtained from fresh cell lysates was subjected to SDS polyacrylamide gel electrophoresis on 6% (FLAG-BRCA2) or 10% (beta-Actin) polyacrylamide gels. Precision Plus Protein All Blue Standards (Thermo Fisher Scientific) were run as molecular weight markers along with samples. Electrophoresis was performed at 150 V, and the gels were transferred to an Immobilon-P transfer membrane (Millipore) overnight at 50 V. The membranes were blocked with 5% nonfat dry milk in 0.05% Tween 20 containing Tris-buffered saline (TBST) at room temperature for 1 hour, and then incubated with a 500-fold diluted primary anti-FLAG antibody (F3165; Sigma) or a 2,000-fold diluted primary anti-beta-Actin antibody (#4970; Cell Signaling Technology) in TBST at 4 °C for 16 hours. Subsequently, the membranes were incubated with 10,000-fold diluted peroxidase-linked secondary antibody (NA931V for FLAG-BRCA2 and NA934V for beta-Actin; GE Healthcare) at room temperature for 4 hours.

The target proteins were visualized by an enhanced chemiluminescence reagent, SuperSignal West Femto (GE Healthcare).

### Cell viability assay

DLD1 *BRCA2* (-/-) cells harboring 20 variants of *BRCA2* cDNA and empty vector, untransduced DLD1 *BRCA2* (-/-) cells, and DLD1 parental cells were seeded in 96-well plates at a density of  $2.0 \times 10^3$  cells/well with 100  $\mu$ l of medium/well, and each drug was added at various concentrations: olaparib (50 nM–5  $\mu$ M, Selleckchem), niraparib (10 nM–1  $\mu$ M, Selleckchem), rucaparib (50 nM–5  $\mu$ M, LC Laboratories), and CBDCA (50 nM–5  $\mu$ M, Selleckchem). DMSO (Nacalai Tesque) was added to a final concentration of 0.01% (volume/volume) to wells without drugs. Ten microliters of PrestoBlue cell viability reagent (Thermo Fisher Scientific) was added to each well 144 hours after exposure to these drugs, and fluorescence intensity was measured with a 2030 ARVO X3 microplate reader (PerkinElmer) (excitation; 530 nm, emission; 590 nm)<sup>51</sup>. Wells without cells were assessed as the negative controls, and survival data were graphically analyzed as a sigmoid curve by GraphPad Prism software v8.02 for Mac (GraphPad Software, Inc).

### MANO-B method

The original MANO method is a high-throughput functional assay previously reported by our laboratory<sup>28, 29</sup>. Individually established DLD1 *BRCA2* (-/-) cells with stable *BRCA2* expression were mixed equally and cultured competitively. Cells were seeded at a density of  $1 \times 10^4$  cells/cm<sup>2</sup> on day 0. During the 12-day treatment with PARP inhibitors (olaparib, niraparib, and rucaparib), CBDCA or DMSO, cells were passaged once, on day 6. On day 12, genomic DNA was isolated from cell lysates with a QIAamp DNA Mini Kit (Qiagen). Barcode sequences were amplified by PCR using 300 ng of genomic DNA (100,000-genome and

500,000-barcode equivalent, by the weight of 6 pg of genomic DNA per cell and an average copy number of integrated cDNA of 10 copies per cell) and primers containing index sequences for deep sequencing (**Supplementary Table 3**). The quantity and quality of the obtained libraries were evaluated using a Qubit 2.0 fluorometer (Thermo Fisher Scientific) and an Agilent 2200 TapeStation system. Libraries were deep sequenced on the MiSeq sequencer using a Reagent Kit V2 (300 cycles), and the number of each barcode in each variant was counted. Variants were tested in at least two independent batches in technical triplicate. In every experiment, the wild-type and the D2723H variant were included as the benign and pathogenic controls, respectively. In each independent batch, cells were transfected with the plasmids independently on each occasion because transfection efficiency has a large impact on genomic integration and gene expression, which could affect the result of the MANO-B method. A single clone of each plasmid harboring each desired mutation was used for all batches. To remove the concern that a plasmid harbored an additional undesired mutation, we had the entire sequence of each plasmid checked (including the vector backbone) rather than using two independent clones. In batch #1, 107 variants and one empty vector were evaluated. In batches #2 and #3, 244 variants and one empty vector were evaluated. The specific variants are shown in **Supplementary Table 1**.

## **Model assessment**

The expectation–maximization algorithm was used to determine the appropriate Gaussian mixture model for the data from the MANO-B method with the “mclust” package for the R language<sup>52</sup>. The model with the highest Bayesian information criterion (BIC) was adopted.

## **Bayesian hierarchical model analysis**

Barcode counts obtained by the MANO-B method were analyzed using a Bayesian hierarchical mixed model for variant function, which was a modified version of the VarCall model, as previously described<sup>32</sup>. The fold change in the barcode count for variants treated with each drug relative to that for variants treated with the DMSO control was calculated. These values were log normalized to the standard values of  $\log_{10}(1.0)$  for wild-type and  $\log_{10}(0.003)$  for D2723H as anchors. The remaining 242 variants were unlabeled for pathogenicity in this analysis. We hypothesized that the functional variant-specific effect  $\eta_v$  followed a 2-component Gaussian mixture distribution. The prior probability of the variants' pathogenicity inside key domains was noninformative or based on the Align-GVGD classification obtained from the HCI Breast Cancer Genes Prior probabilities website (<http://priors.hci.utah.edu/PRIORS>) and the BRCA Exchange website (<https://brcaexchange.org>). The Align-GVGD classification (C0–C65) was defined on the basis of evolutionary conservation of the protein sequence from *Strongylocentrotus purpuratus* to *Homo sapiens*. Key functional domains annotated by the HCI Breast Cancer Genes Prior probabilities website were as follows: the PALB2 interaction domain (amino acid residues 10–40), DNA-binding domain (2481–3186), and TR2 RAD51-binding domain (3269–3305). The prior probability outside key domains was estimated at 0.02 by the HCI and the BRCA Exchange, independent of the Align-GVGD classification.

The equations and parameters of the model are as follows.

$$\prod_v \Pr(f_v | D_v, X_v, \theta) = \prod_{\{v: D_v=D\}} \Pr(f_v | D_v = D, X_v, \theta) \prod_{\{v: D_v=N\}} \Pr(f_v | D_v = N, X_v, \theta) \prod_{\{v: D_v \text{ is Unknown} \}} [\pi_{a(v,D)} \Pr(f_v | D_v = D, X_v, \theta) + \pi_{a(v,N)} \Pr(f_v | D_v = N, X_v, \theta)]$$

The terms in the equation above are addressed below.

$\Pr(\text{Data} | \text{Parameters})$ : likelihood of Data observation with Parameters

$v$ : variant index

$f_v$ : measurements of functional experiments for  $v$

$D_v$ :  $\begin{cases} D_v = D & (v = \text{deleterious}) \\ D_v = N & (v = \text{neutral}) \end{cases}$

$X_v$ : batch and experimental indices for each measurement

$\theta$ : model parameters

$\pi_{a(v,D/N)}$ : prior probability that  $v$  is deleterious/neutral

The true distributions of the data and parameters were estimated by the formula below.

$$\Pr(f_{v^*} | D_{v^*}, X_{v^*}, \theta) = \prod_{\{(v,b,e): v=v^*\}} \Pr(f_v | D_v, b, e, \theta)$$

We established some constraints and weakly informative prior distributions as described below.

$b$ : batch index

$e$ : experimental index

$\beta_b$ : batch-specific random intercept effect

$\tau_b$ : batch-specific random slope effect

$\kappa_1$ : center of the distribution  $\beta_b$

$\kappa_2$ : center of the distribution  $\tau_b$

$\lambda_1$ : standard deviation of distribution  $\beta_b$

$\lambda_2$ : standard deviation of distribution  $\tau_b$

$\eta_v$ : variant-specific random effect

$\eta_{\text{del}}$ : center of the deleterious variants'  $\eta_v$  distribution

$\eta_{\text{neu}}$ : center of the neutral variants'  $\eta_v$  distribution

$\sigma_1$ : standard deviation of the deleterious variants'  $\eta_v$  distribution

$\sigma_2$ : standard deviation of the neutral variants'  $\eta_v$  distribution

$\psi$ : residual error

Key domains:  $\begin{cases} \text{PALB2 interaction domain (amino acid residues 10-40)} \\ \text{DNA-binding domain (2481-3186)} \\ \text{TR2 RAD51-binding domain (3269-3305)} \end{cases}$

The terms in the formulae above are addressed below.



$$\begin{aligned}
 f_v &\sim \text{Normal}(\beta_b + \tau_b \eta_v, \tau_b \psi) \\
 \beta_b &\sim \text{Normal}(\kappa_1, \lambda_1) \\
 \tau_b &\sim \text{Normal}(\kappa_2, \lambda_2), \tau_b > 0 \\
 \eta_v | D_v = D &\sim \text{Normal}(\eta_{\text{del}}, \sigma_1) \quad \{v : D_v = D \wedge v \neq \text{D2723H}\} \\
 \eta_v | D_v = N &\sim \text{Normal}(\eta_{\text{neu}}, \sigma_2) \quad \{v : D_v = N \wedge v \neq \text{WT}\} \\
 \eta_{\text{WT}} &= \log_{10}(1.0) \\
 \eta_{\text{D2723H}} &= \log_{10}(0.003) \\
 \eta_{\text{hue}} &= \text{estimated value by mclust package with the training data set} \\
 \eta_{\text{del}} &\sim \text{Normal}(\eta_{\text{D2723H}}, 5) \quad (\text{training data set}) \\
 \eta_{\text{del}} &= \text{as } \beta_b + \tau_b \eta_{\text{del}} \text{ value is the same in the training data set} \quad (\text{full analysis}) \\
 \kappa_1 &\sim \text{Normal}(0, 5) \\
 \kappa_2 &\sim \text{Normal}(1, 5) \\
 \psi, \sigma_1, \sigma_2, \lambda_1, \lambda_2 &\stackrel{iid}{\sim} \text{HalfNormal}(0, 5) \\
 D_v &\sim \text{Bernoulli}(\pi_{a(v)}) \quad \{v : D_v \text{ is unknown}\} \\
 \pi_{a(v)} &\sim \text{Beta}(1, 1) \quad (\text{noninformative prior probability}) \\
 &\text{or} \\
 &\text{Align-GVGD-based prior probability} \\
 &\left\{ \begin{array}{ll} \pi_{a(v)} \sim \text{Beta}(15.00, 3.48) & \{v \in C65, \text{inside key domains}\} \\ \pi_{a(v)} \sim \text{Beta}(5.38, 2.57) & \{v \in C35, C45, C55, \text{inside key domains}\} \\ \pi_{a(v)} \sim \text{Beta}(3.76, 9.00) & \{v \in C15, C25, \text{inside key domains}\} \\ \pi_{a(v)} \sim \text{Beta}(1.43, 73.1) & \{v \in C0, \text{inside key domains}\} \\ \pi_{a(v)} \sim \text{Beta}(1.64, 120.44) & \{v \in \text{outside key domains}\} \\ \pi_{a(v)} \sim \text{Beta}(387, 1.07) & \{v \in \text{nonsense variants}\} \end{array} \right.
 \end{aligned}$$

In the above model, the fixed value  $\eta_{\text{neu}}$  was arbitrarily estimated by the mclust package with the training set data. In the full analysis,  $\eta_{\text{del}}$  was fixed such that the value of  $\beta_b + \tau_b \eta_{\text{del}}$  was the same as that in the training data set.  $\text{Normal}(\mu, \sigma)$  denotes the normal distribution with mean  $\mu$  and standard deviation  $\sigma$ ;  $X \sim \text{HalfNormal}(0, 5)$  indicates that  $X$  is normally distributed with a mean of 0 and a standard deviation of 5 but is constrained to be nonnegative. The parameters of the Beta distributions were determined such that their 2.5th and 97.5th percentiles fit the upper and lower 95% confidence limits of the Align-GVGD prediction for each class<sup>36</sup>. The ranges of the normal distributions for the parameters' prior distributions were set to adequately exceed the range of values expected for those parameters. The half-Cauchy distribution was thought to be superior to other weakly informative prior distributions for variance component parameters<sup>53</sup>, but the Cauchy distribution might be too broad for our

model because very large values could not occur. Thus, a half-normal distribution was adopted for variance component parameters.

## Inference

A Hamiltonian Monte Carlo algorithm was used to perform inference for the above model. The source code written in the R<sup>54</sup> and Stan<sup>55</sup> languages is available (<https://github.com/MANO-B/Bayes>). We ran 4 chains of samplers, including 1,500 warmup iterations followed by 3,500 sampling iterations, and every sampling iteration was adopted. The chain passed the Gelman and Rubin's convergence diagnostic, as the R-hat values were less than 1.1 for all parameters<sup>56</sup>, indicating convergence across the 4 chains initiated from disparate starting values, and the simulated posterior values were drawn from the true posterior for each parameter. The marginal posterior means and credible intervals (CIs) of the model parameters, the BF and posterior probabilities of the pathogenic categories for each variant were calculated.

## Posterior Predictive Checks

To validate the model's correctness, the fitness of estimation to observed data from 244 variants was statistically checked. QQ plots of the posterior expected standardized residuals of the log-normalized relative viability were generated using the “car” package for the R language<sup>57</sup>. Simultaneous 95% CIs are plotted as green dotted lines. To confirm the match between the posterior predictive distribution of  $f_v$  and the observed data, we randomly drew 512 parameter samples from the trace. Then, we generated 612 random values per variant from a normal distribution specified by the values of  $\eta$ ,  $\beta$ ,  $\tau$ , and  $\psi$  for each sample, accounting for the batch-to-batch ratio. A posterior predictive density curve of the log-normalized relative viability data was computed from 612 generated data sets containing 512 samples each.

## HDR assay

Twenty-four *BRCA2* variants encoded individually in the piggyBac vector and an I-SceI expression vector, pCBASce, were cotransfected into DLD1 *BRCA2* (-/-) cells harboring the DRGFP sequence, according to a previous report<sup>18, 58</sup>. Twenty-four hours before transfection, cells were seeded in 12-well plates at a density of  $1 \times 10^5$  cells/well. Prior to transfection, the culture medium was replaced with 1 ml of fresh medium. The transfection mixture for individual wells was composed of 1  $\mu$ g of the *BRCA2* expression vector, 500 ng of the pCBASce vector, 4  $\mu$ l of Lipofectamine Stem Transfection Reagent, and 250  $\mu$ l of Opti-MEM I Reduced Serum Medium. The transfection mixture was added to each well after 20 minutes of incubation at room temperature. I-SceI-induced DNA double-strand breaks in the DRGFP sequence were subsequently repaired by homologous recombination, and intact GFP-expressing cells were produced. Four days after transfection, cells were collected, and GFP-positive cells were counted by fluorescence-activated cell sorting (FACS) using a BD FACSCanto II (BD Bioscience). Every cell count was normalized and rescaled relative to a 1:5 ratio of D2723H:wild-type. All variants were analyzed in biological duplicate and technical triplicate.

## Statistical Analysis

All analyses were performed via the R language. The data are the means  $\pm$  SD, means  $\pm$  , or means  $\pm$  95% CI, as stated in the figure legends. Differences between variants were determined by the Kruskal-Wallis rank sum test.  $p < 0.05$  was considered statistically significant.

## Acknowledgments

We thank A. Maruyama for technical assistance and N. Tanabe and T. Yoshida for collecting data.

## Authors' Contributions

**Conception and design:** S. Kohsaka and H. Mano

**Development of methodology:** M. Ikegami, S. Kohsaka, and H. Mano

**Acquisition of data (provided animals, acquired and managed patients, provided facilities, etc.):** M. Ikegami

**Analysis and interpretation of data (e.g., statistical analysis, biostatistics, computational analysis):** M. Ikegami and T. Ueno

**Writing, review, and/or revision of the manuscript:** M. Ikegami, S. Kohsaka, and H. Mano

**Administrative, technical, or material support (i.e., reporting or organizing data, constructing databases):** Y. Momozawa, K. Tamura, A. Shimomura, and N. Hosoya

**Study supervision:** H. Kobayashi and S. Tanaka

## Figure Legends

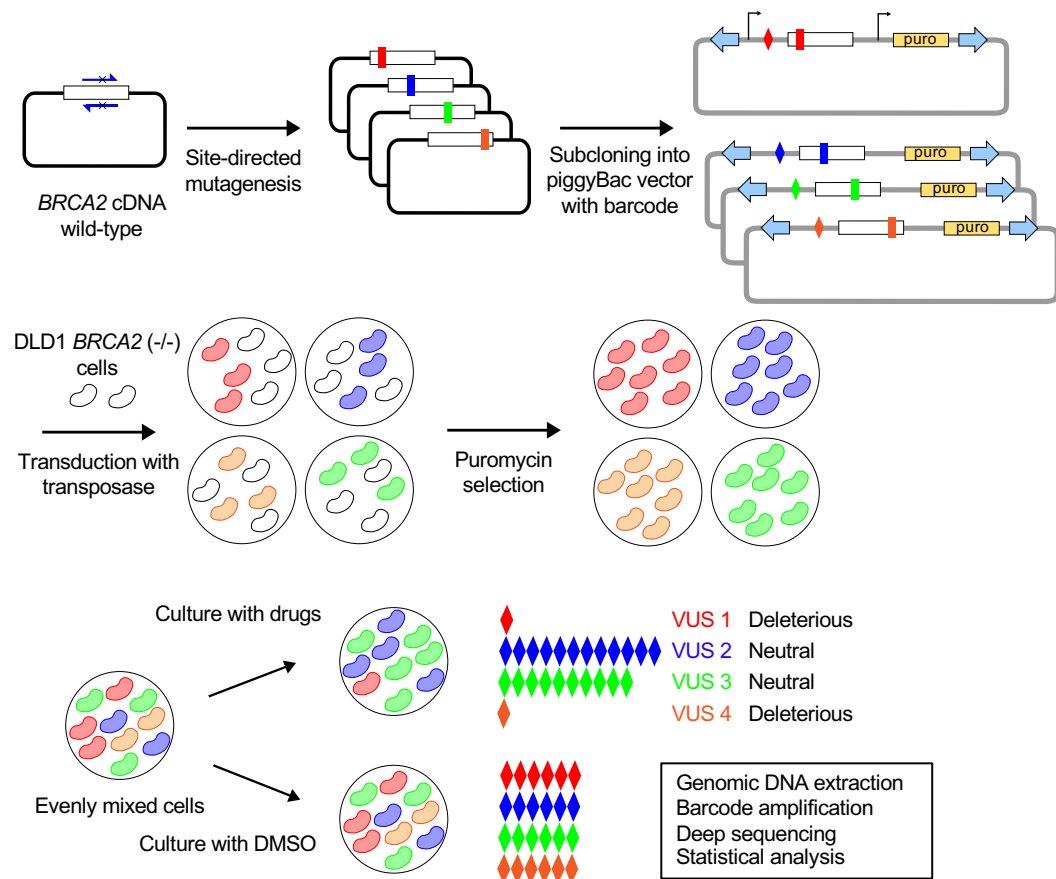

**Figure 1.** Schematic representation of the MANO-B method. *BRCA2* variants of interest were generated by site-directed mutagenesis and subcloned into the piggyBac transposon vector with a unique barcode sequence, followed by sequence verification. DLD1 *BRCA2* (-/-) cells were individually cotransfected with the *BRCA2* constructs and transposase expression vector. After puromycin selection of stable transfectants, equal numbers of DLD1 cells were mixed and cultured with PARP inhibitors, CBDCA, or DMSO for 12 d. The barcode sequences were amplified by PCR with genomic DNA extracted from the cell mixture and deep sequenced to quantify their relative abundances. The ratio of each barcode abundance was normalized to that of the DMSO-treated control. The relative viability data were analyzed by Bayesian inference, and the pathogenicity of each variant was then classified.

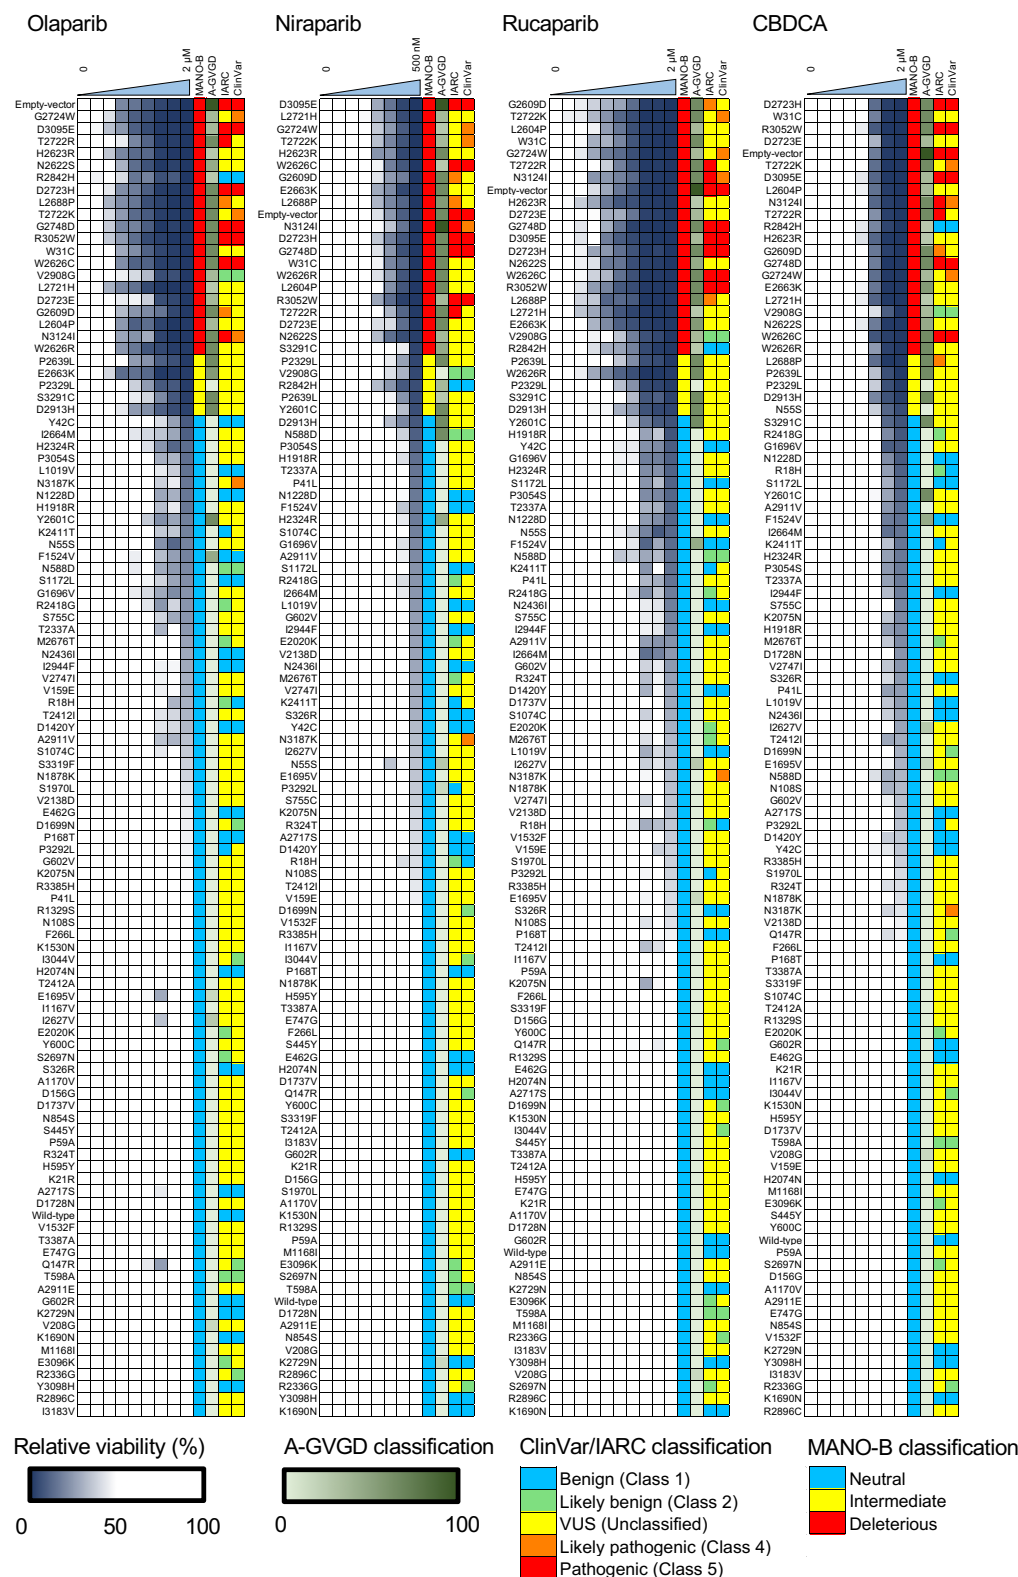

Figure 2.

**Figure 2.** Comparative results of the MANO-B method with the IARC, ClinVar, and Align-GVGD classifications for 107 variants. DLD1 *BRCA2* (–/–) cells transfected separately with

the 107 *BRCA2* variants or the empty vector were treated with PARP inhibitors (olaparib, niraparib, and rucaparib), CBDCA, or DMSO at the indicated concentrations. The relative viability of the cells treated with each drug was calculated based on the viability of vehicle-treated cells, then normalized to that of cells expressing wild-type *BRCA2*. All variants were ordered by relative viability at the optimal concentration. The classification of the MANO-B method was based on the relative viability at the optimal concentration of each drug and defined as neutral (relative viability of 1–82), intermediate (83–87), and deleterious (88–108). The IARC, ClinVar, and Align-GVGD classifications are color-coded in each column. The ClinVar classifications of five variants (V159E, M1168I, K1530N, G1696V, and A2911E) without assertion criteria were considered as VUSs.

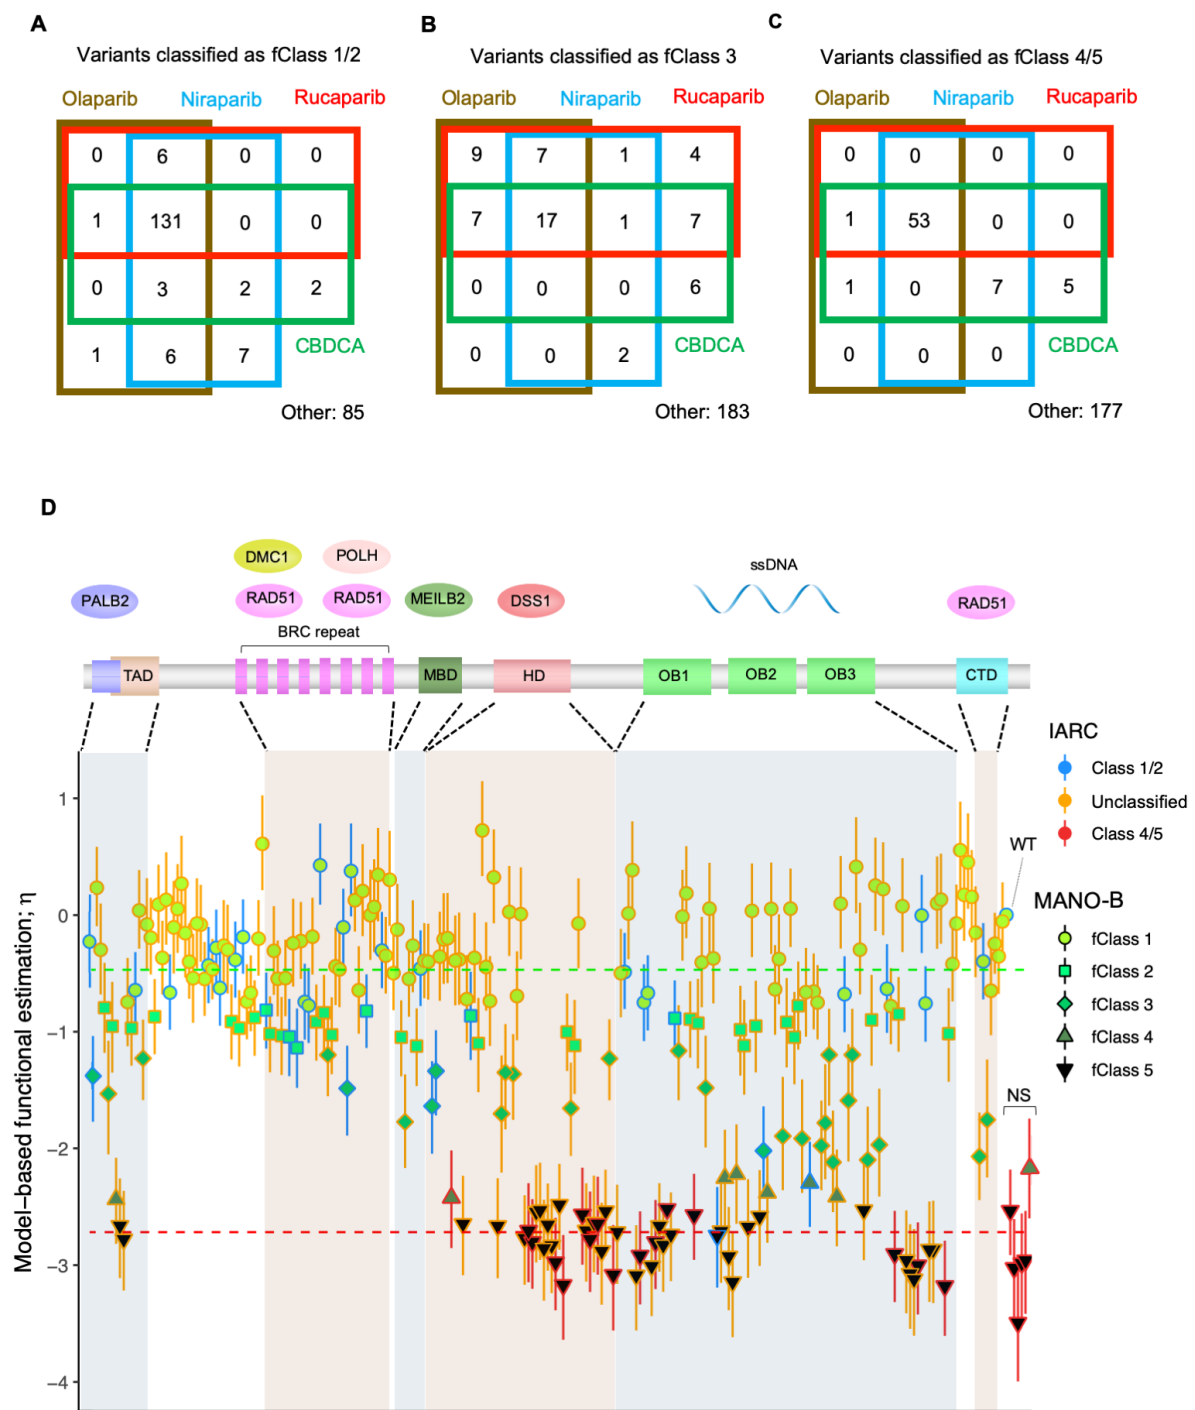

**Figure 3.** Evaluation of 244 *BRCA2* variants by applying Bayesian inference to the MANO-B method. **A-C**, Functional classification by the MANO-B method with four drugs. A total of 244 *BRCA2* variants were classified by Bayesian inference. The number of variants classified for each drug as fClass 1/2 (**A**), fClass3 (**B**), and fClass4/5 (**C**) is shown. No variant was



classified as fClass1/2 with one drug and fClass 4/5 with another drug. **D**, Bar plots of functional variant effects and functional diagnosis of 244 *BRCA2* variants mapped against the *BRCA2* full-length sequence and domains. The key domains of *BRCA2* consist of a PALB2 interaction domain encompassing amino acids (a.a.) 10–40, a transactivation domain (TAD) encompassing a.a. 18–105, a RAD51-binding domain including eight BRC repeats encompassing a.a. 1008–2082, an MEILB2-binding domain (MBD) encompassing a.a. 2117–2339, a DNA-binding domain encompassing a.a. 2402–3186 and containing a helical domain (HD) encompassing a.a. 2402–2669, oligonucleotide/oligosaccharide-binding domains (OBs) (OB) encompassing a.a. 2670–2803, 2809–3048, and 3056–3102, and a C-terminal RAD51-binding domain (CTD) encompassing a.a. 3270–3305. The function of each variant was estimated as a variant-specific effect value,  $\eta_v$ , based on a two-component model. Data of niraparib are shown as a representative case. The upper and lower components correspond to neutral function and loss-of-function, respectively. The dotted lines indicate the median value of each component. The classification of each variant based on the Bayes factor (BF) is indicated by the color and shape of the lines and plots, as shown in the legend. Variant functions were classified into five classes by the MANO-B method: fClass 1 (neutral) ( $BF \leq 0.003$ ), fClass 2 (likely neutral) ( $0.003 < BF \leq 0.053$ ), fClass 3 (intermediate) ( $0.053 < BF < 18.7$ ), fClass 4 (likely deleterious) ( $18.7 \leq BF < 350$ ), and fClass 5 (deleterious) ( $350 \leq BF$ ). Open error bars, 95% CIs. WT, wild-type; NS, nonsense variants.

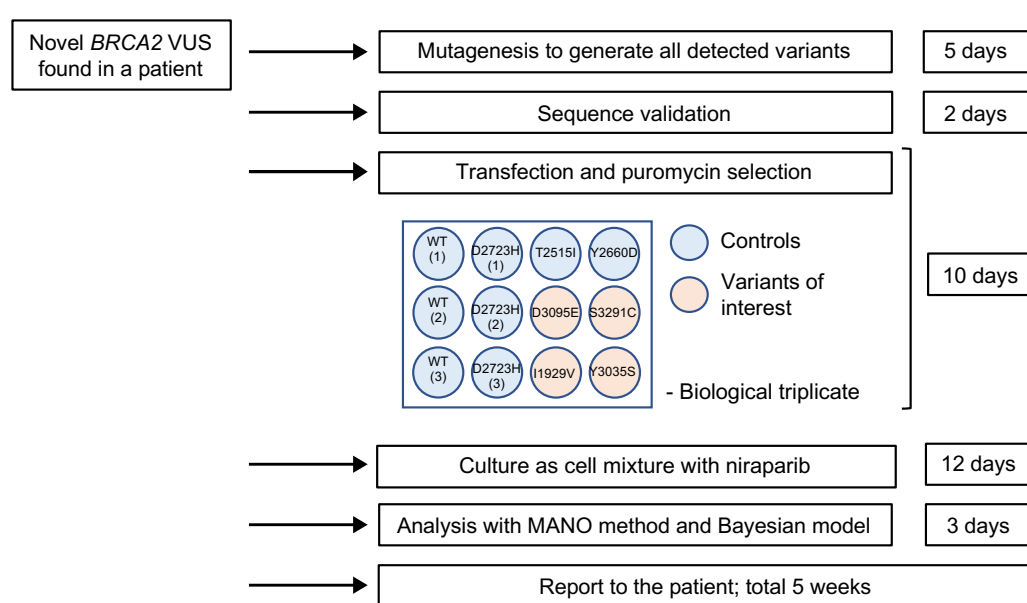

**Figure 4.** The Accurate BRCA Companion Diagnostic (ABCD) test for the clinical functional annotation of novel *BRCA2* VUSs. Schematic representation of the ABCD test. *BRCA2* mutations were investigated by genomic DNA sequencing. The effect of mutations on mRNA splicing was evaluated by RNA sequencing to detect the aberrant *BRCA2* transcripts. All detected cDNAs, including four control variants for neutral (wild-type and T2515I) and deleterious (Y2660D and D2723H) mutations and four variants of interest, were generated for assessment by the small-scale MANO-B method in a 12-well plate. Technical and biological triplicate experiments using niraparib at 0.5  $\mu$ M are recommended. Data analysis was performed with data from previous experiments, enabling batch effect adjustment. The experimental steps and required times are indicated.

| Variant | IARC classification | ABCD test          | $\eta$ |        |       |                       | fClass   |
|---------|---------------------|--------------------|--------|--------|-------|-----------------------|----------|
|         |                     |                    | Mean   | 95% CI |       | BF                    |          |
| I1929V  | Class 1             | Previous batches   | 0.37   | -0.02  | 0.79  | $1.05 \times 10^{-5}$ | fClass 1 |
|         |                     | New batch-1        | 0.19   | -0.33  | 0.73  | $1.02 \times 10^{-5}$ | fClass 1 |
|         |                     | New batch-2        | -0.23  | -0.73  | 0.28  | $1.63 \times 10^{-4}$ | fClass 1 |
|         |                     | New batch-3        | 0.08   | -0.43  | 0.60  | $3.71 \times 10^{-5}$ | fClass 1 |
|         |                     | 3 batches combined | 0.11   | -0.23  | 0.44  | $1.40 \times 10^{-5}$ | fClass 1 |
| Y3035S  | Class 2             | Previous batches   | -0.63  | -1.01  | -0.25 | $1.11 \times 10^{-3}$ | fClass 1 |
|         |                     | New batch-1        | -0.55  | -1.05  | -0.04 | $1.12 \times 10^{-3}$ | fClass 1 |
|         |                     | New batch-2        | -0.53  | -1.04  | -0.02 | $9.57 \times 10^{-4}$ | fClass 1 |
|         |                     | New batch-3        | -0.36  | -0.87  | 0.16  | $3.01 \times 10^{-4}$ | fClass 1 |
|         |                     | 3 batches combined | -0.47  | -0.79  | -0.15 | $2.79 \times 10^{-4}$ | fClass 1 |
| D3095E  | Class 5             | Previous batches   | -3.00  | -3.41  | -2.62 | $1.33 \times 10^4$    | fClass 5 |
|         |                     | New batch-1        | -2.31  | -2.80  | -1.78 | $4.45 \times 10^1$    | fClass 4 |
|         |                     | New batch-2        | -2.63  | -3.12  | -2.15 | $5.75 \times 10^2$    | fClass 5 |
|         |                     | New batch-3        | -2.69  | -3.20  | -2.19 | $9.28 \times 10^2$    | fClass 5 |
|         |                     | 3 batches combined | -2.52  | -2.85  | -2.19 | $7.85 \times 10^2$    | fClass 5 |
| S3291C  | Unclassified        | Previous batches   | -2.07  | -2.43  | -1.69 | $1.15 \times 10^1$    | fClass 3 |
|         |                     | New batch-1        | -1.06  | -1.70  | -0.53 | $6.15 \times 10^{-2}$ | fClass 3 |
|         |                     | New batch-2        | -2.06  | -2.60  | -1.34 | $7.05 \times 10^0$    | fClass 3 |
|         |                     | New batch-3        | -1.35  | -2.12  | -0.74 | $3.17 \times 10^{-1}$ | fClass 3 |
|         |                     | 3 batches combined | -1.46  | -1.86  | -1.11 | $3.39 \times 10^{-1}$ | fClass 3 |

BF, Bayes factor; LL, lower limit; UL, upper limit; CI, credible interval.

**Table 1.** Results of an experimental ABCD test. The classification of the four variants was reproducible and consistent with that observed for previous large-scale batches. BF, Bayes factor; LL, lower limit; UL, upper limit; CI, credible interval.

## References

1. Wooster R, Weber BL. Breast and ovarian cancer. *N Engl J Med* **348**, 2339-2347 (2003).
2. Finch AP, *et al.* Impact of oophorectomy on cancer incidence and mortality in women with a BRCA1 or BRCA2 mutation. *Journal of clinical oncology : official journal of the American Society of Clinical Oncology* **32**, 1547-1553 (2014).
3. Heemskerk-Gerritsen BA, *et al.* Prophylactic mastectomy in BRCA1/2 mutation carriers and women at risk of hereditary breast cancer: long-term experiences at the Rotterdam Family Cancer Clinic. *Ann Surg Oncol* **14**, 3335-3344 (2007).
4. Paluch-Shimon S, *et al.* Prevention and screening in BRCA mutation carriers and other breast/ovarian hereditary cancer syndromes: ESMO Clinical Practice Guidelines for cancer prevention and screening. *Ann Oncol* **27**, v103-v110 (2016).
5. Farmer H, *et al.* Targeting the DNA repair defect in BRCA mutant cells as a therapeutic strategy. *Nature* **434**, 917-921 (2005).
6. Bryant HE, *et al.* Specific killing of BRCA2-deficient tumours with inhibitors of poly(ADP-ribose) polymerase. *Nature* **434**, 913-917 (2005).
7. Richards S, *et al.* Standards and guidelines for the interpretation of sequence variants: a joint consensus recommendation of the American College of Medical Genetics and Genomics and the Association for Molecular Pathology. *Genet Med* **17**, 405-424 (2015).
8. Plon SE, *et al.* Sequence variant classification and reporting: recommendations for improving the interpretation of cancer susceptibility genetic test results. *Hum Mutat* **29**, 1282-1291 (2008).

9. Tavgian SV, Greenblatt MS, Goldgar DE, Boffetta P, Group IUGVW. Assessing pathogenicity: overview of results from the IARC Unclassified Genetic Variants Working Group. *Hum Mutat* **29**, 1261-1264 (2008).
10. Easton DF, *et al.* A systematic genetic assessment of 1,433 sequence variants of unknown clinical significance in the BRCA1 and BRCA2 breast cancer-predisposition genes. *American journal of human genetics* **81**, 873-883 (2007).
11. Lindor NM, *et al.* A review of a multifactorial probability-based model for classification of BRCA1 and BRCA2 variants of uncertain significance (VUS). *Hum Mutat* **33**, 8-21 (2012).
12. Momozawa Y, *et al.* Germline pathogenic variants of 11 breast cancer genes in 7,051 Japanese patients and 11,241 controls. *Nat Commun* **9**, 4083 (2018).
13. Ernst C, *et al.* Performance of in silico prediction tools for the classification of rare BRCA1/2 missense variants in clinical diagnostics. *BMC Med Genomics* **11**, 35 (2018).
14. Toland AE, Andreassen PR. DNA repair-related functional assays for the classification of BRCA1 and BRCA2 variants: a critical review and needs assessment. *J Med Genet* **54**, 721-731 (2017).
15. Findlay GM, *et al.* Accurate classification of BRCA1 variants with saturation genome editing. *Nature* **562**, 217-222 (2018).
16. Starita LM, *et al.* Massively Parallel Functional Analysis of BRCA1 RING Domain Variants. *Genetics* **200**, 413-422 (2015).
17. Starita LM, *et al.* A Multiplex Homology-Directed DNA Repair Assay Reveals the Impact of More Than 1,000 BRCA1 Missense Substitution

- 836 Variants on Protein Function. *American journal of human genetics* **103**,  
837 498-508 (2018).
- 838
- 839 18. Guidugli L, *et al.* Assessment of the Clinical Relevance of BRCA2  
840 Missense Variants by Functional and Computational Approaches.  
841 *American journal of human genetics*, (2018).
- 842
- 843 19. Hart SN, *et al.* Comprehensive annotation of BRCA1 and BRCA2  
844 missense variants by functionally validated sequence-based computational  
845 prediction models. *Genet Med*, (2018).
- 846
- 847 20. Guidugli L, *et al.* Functional assays for analysis of variants of uncertain  
848 significance in BRCA2. *Hum Mutat* **35**, 151-164 (2014).
- 849
- 850 21. Ding S, Wu X, Li G, Han M, Zhuang Y, Xu T. Efficient transposition of the  
851 piggyBac (PB) transposon in mammalian cells and mice. *Cell* **122**, 473-483  
852 (2005).
- 853
- 854 22. Hucl T, Rago C, Gallmeier E, Brody JR, Gorospe M, Kern SE. A syngeneic  
855 variance library for functional annotation of human variation: application  
856 to BRCA2. *Cancer research* **68**, 5023-5030 (2008).
- 857
- 858 23. Drean A, *et al.* Modeling Therapy Resistance in BRCA1/2-Mutant  
859 Cancers. *Mol Cancer Ther* **16**, 2022-2034 (2017).
- 860
- 861 24. Cline MS, *et al.* BRCA Challenge: BRCA Exchange as a global resource for  
862 variants in BRCA1 and BRCA2. *PLoS Genet* **14**, e1007752 (2018).
- 863
- 864 25. Parsons MT, *et al.* Large scale multifactorial likelihood quantitative  
865 analysis of BRCA1 and BRCA2 variants: An ENIGMA resource to support  
866 clinical variant classification. *Hum Mutat* **40**, 1557-1578 (2019).
- 867

26. Lee JS, *et al.* Reclassification of BRCA1 and BRCA2 variants of uncertain significance: a multifactorial analysis of multicentre prospective cohort. *J Med Genet* **55**, 794-802 (2018).
27. Yusa K, Zhou L, Li MA, Bradley A, Craig NL. A hyperactive piggyBac transposase for mammalian applications. *Proc Natl Acad Sci USA* **108**, 1531-1536 (2011).
28. Kohsaka S, *et al.* A method of high-throughput functional evaluation of EGFR gene variants of unknown significance in cancer. *Science translational medicine* **9**, (2017).
29. Nagano M, *et al.* High-throughput functional evaluation of variants of unknown significance in ERBB2. *Clin Cancer Res* **24**, 5112-5122 (2018).
30. So MK, *et al.* Reinterpretation of BRCA1 and BRCA2 variants of uncertain significance in patients with hereditary breast/ovarian cancer using the ACMG/AMP 2015 guidelines. *Breast Cancer*, (2019).
31. Woods NT, *et al.* Functional assays provide a robust tool for the clinical annotation of genetic variants of uncertain significance. *NPJ Genom Med* **1**, (2016).
32. Iversen ES, Jr., Couch FJ, Goldgar DE, Tavtigian SV, Monteiro AN. A computational method to classify variants of uncertain significance using functional assay data with application to BRCA1. *Cancer Epidemiol Biomarkers Prev* **20**, 1078-1088 (2011).
33. Tavtigian SV, *et al.* Modeling the ACMG/AMP variant classification guidelines as a Bayesian classification framework. *Genet Med* **20**, 1054-1060 (2018).
34. Xia B, *et al.* Control of BRCA2 cellular and clinical functions by a nuclear partner, PALB2. *Mol Cell* **22**, 719-729 (2006).

35. Zhang J, Fujiwara Y, Yamamoto S, Shibuya H. A meiosis-specific BRCA2 binding protein recruits recombinases to DNA double-strand breaks to ensure homologous recombination. *Nat Commun* **10**, 722 (2019).
36. Tavtigian SV, Byrnes GB, Goldgar DE, Thomas A. Classification of rare missense substitutions, using risk surfaces, with genetic- and molecular-epidemiology applications. *Hum Mutat* **29**, 1342-1354 (2008).
37. Esashi F, *et al.* CDK-dependent phosphorylation of BRCA2 as a regulatory mechanism for recombinational repair. *Nature* **434**, 598-604 (2005).
38. Farber-Katz S, *et al.* Quantitative analysis of BRCA1 and BRCA2 germline splicing variants using a novel RNA-massively parallel sequencing assay. *Front Oncol* **8**, 286 (2018).
39. Farrugia DJ, *et al.* Functional assays for classification of BRCA2 variants of uncertain significance. *Cancer research* **68**, 3523-3531 (2008).
40. Balia C, Galli A, Caligo MA. Effect of the overexpression of BRCA2 unclassified missense variants on spontaneous homologous recombination in human cells. *Breast Cancer Res Treat* **129**, 1001-1009 (2011).
41. Shimelis H, *et al.* BRCA2 hypomorphic missense variants confer moderate risks of breast cancer. *Cancer research* **77**, 2789-2799 (2017).
42. Bradbury AR, *et al.* Uptake and timing of bilateral prophylactic salpingo-oophorectomy among BRCA1 and BRCA2 mutation carriers. *Genet Med* **10**, 161-166 (2008).
43. Lim D, Ngeow J. Evaluation of the methods to identify patients who may benefit from PARP inhibitor use. *Endocr Relat Cancer* **23**, R267-285 (2016).



44. Davies H, *et al.* HRDetect is a predictor of BRCA1 and BRCA2 deficiency based on mutational signatures. *Nature Medicine* **23**, 517-525 (2017).
45. Nones K, *et al.* Whole-genome sequencing reveals clinically relevant insights into the aetiology of familial breast cancers. *Ann Oncol* **30**, 1071-1079 (2019).
46. Daniels MJ, Wang Y, Lee M, Venkitaraman AR. Abnormal cytokinesis in cells deficient in the breast cancer susceptibility protein BRCA2. *Science (New York, NY)* **306**, 876-879 (2004).
47. Shivji MKK, Renaudin X, Williams CH, Venkitaraman AR. BRCA2 regulates transcription elongation by RNA polymerase II to prevent R-loop accumulation. *Cell Rep* **22**, 1031-1039 (2018).
48. Leman R, *et al.* Novel diagnostic tool for prediction of variant spliceogenicity derived from a set of 395 combined in silico/in vitro studies: an international collaborative effort. *Nucleic Acids Res* **46**, 7913-7923 (2018).
49. Acedo A, Hernandez-Moro C, Curiel-Garcia A, Diez-Gomez B, Velasco EA. Functional classification of BRCA2 DNA variants by splicing assays in a large minigene with 9 exons. *Hum Mutat* **36**, 210-221 (2015).
50. Acedo A, *et al.* Comprehensive splicing functional analysis of DNA variants of the BRCA2 gene by hybrid minigenes. *Breast cancer research : BCR* **14**, R87 (2012).
51. Lall N, Henley-Smith CJ, De Canha MN, Oosthuizen CB, Berrington D. Viability reagent, PrestoBlue, in comparison with other available reagents, utilized in cytotoxicity and antimicrobial assays. *Int J Microbiol* **2013**, 420601 (2013).

52. Scrucca L, Fop M, Murphy TB, Raftery AE. mclust 5: clustering, classification and density estimation using Gaussian finite mixture models. *The R journal* **8**, 289-317 (2016).
53. Gelman A. Prior distributions for variance parameters in hierarchical models. *Bayesian Anal*, 515-534 (2006).
54. Ihaka R, Gentleman R. R: a language for data analysis and graphics. *J Comp Graph Stat* **5**, 299-314 (1996).
55. Gelman A, Lee D, Guo J. Stan: A probabilistic programming language for Bayesian inference and optimization. *J Educ Behav Stat* **40**, 530-543 (2015).
56. Brooks SP, Gelman A. General methods for monitoring convergence of iterative simulations. *J Comput Graph Stat* **7**, 434-455 (1997).
57. Fox J, Weisberg S. *An R Companion to Applied Regression*, Second Edition edn. Sage Publications (2011).
58. Guidugli L, *et al.* A classification model for BRCA2 DNA binding domain missense variants based on homology-directed repair activity. *Cancer research* **73**, 265-275 (2013).

## 994    **Supporting Information**

995    Supplementary Figure 1. Stable transduction of *BRCA2* variants into DLD1 *BRCA2* ( $-/-$ ) cells.

996    Supplementary Figure 2. Sensitivities of cells harboring *BRCA2* variants to PARP inhibitors  
997    and CBDCA.

998    Supplementary Figure 3. Relative viability of 107 *BRCA2* variants at the highest drug  
999    concentration by the MANO-B method.

1000    Supplementary Figure 4. Histograms of barcodes obtained in the independent batch #1 of the  
1001    MANO-B method.

1002    Supplementary Figure 5. ROC curves for data obtained from 37 known benign and 22 known  
1003    pathogenic *BRCA2* variants.

1004    Supplementary Figure 6. Model estimation for data obtained from 244 *BRCA2* variants and an  
1005    empty vector.

1006    Supplementary Figure 7. Estimated function and classification for the training set comprising  
1007    known benign and pathogenic *BRCA2* variants defined by the IARC classification.

1008    Supplementary Figure 8. Estimated function and classification for all the established benign  
1009    and pathogenic *BRCA2* variants defined by the ACMG guidelines criteria.

1010    Supplementary Figure 9. Bar plots of functional variant effects and functional diagnosis of 244  
1011    *BRCA2* variants analyzed with Align-GVGD for prior probability.

1012    Supplementary Figure 10. Posterior predictive checks of model parameters.

1013    Supplementary Figure 11. Homology-directed repair assay of 24 *BRCA2* variants.

1014    Supplementary Table 1. Information on *BRCA2* variants and empty vector.

1015    Supplementary Table 2. Raw data from qRT-PCR, digital droplet PCR, and HDR assay.

1016    Supplementary Table 3. Raw data from the MANO-B method.

1017    Supplementary Table 4. Minimum data requirements for the ABCD test.

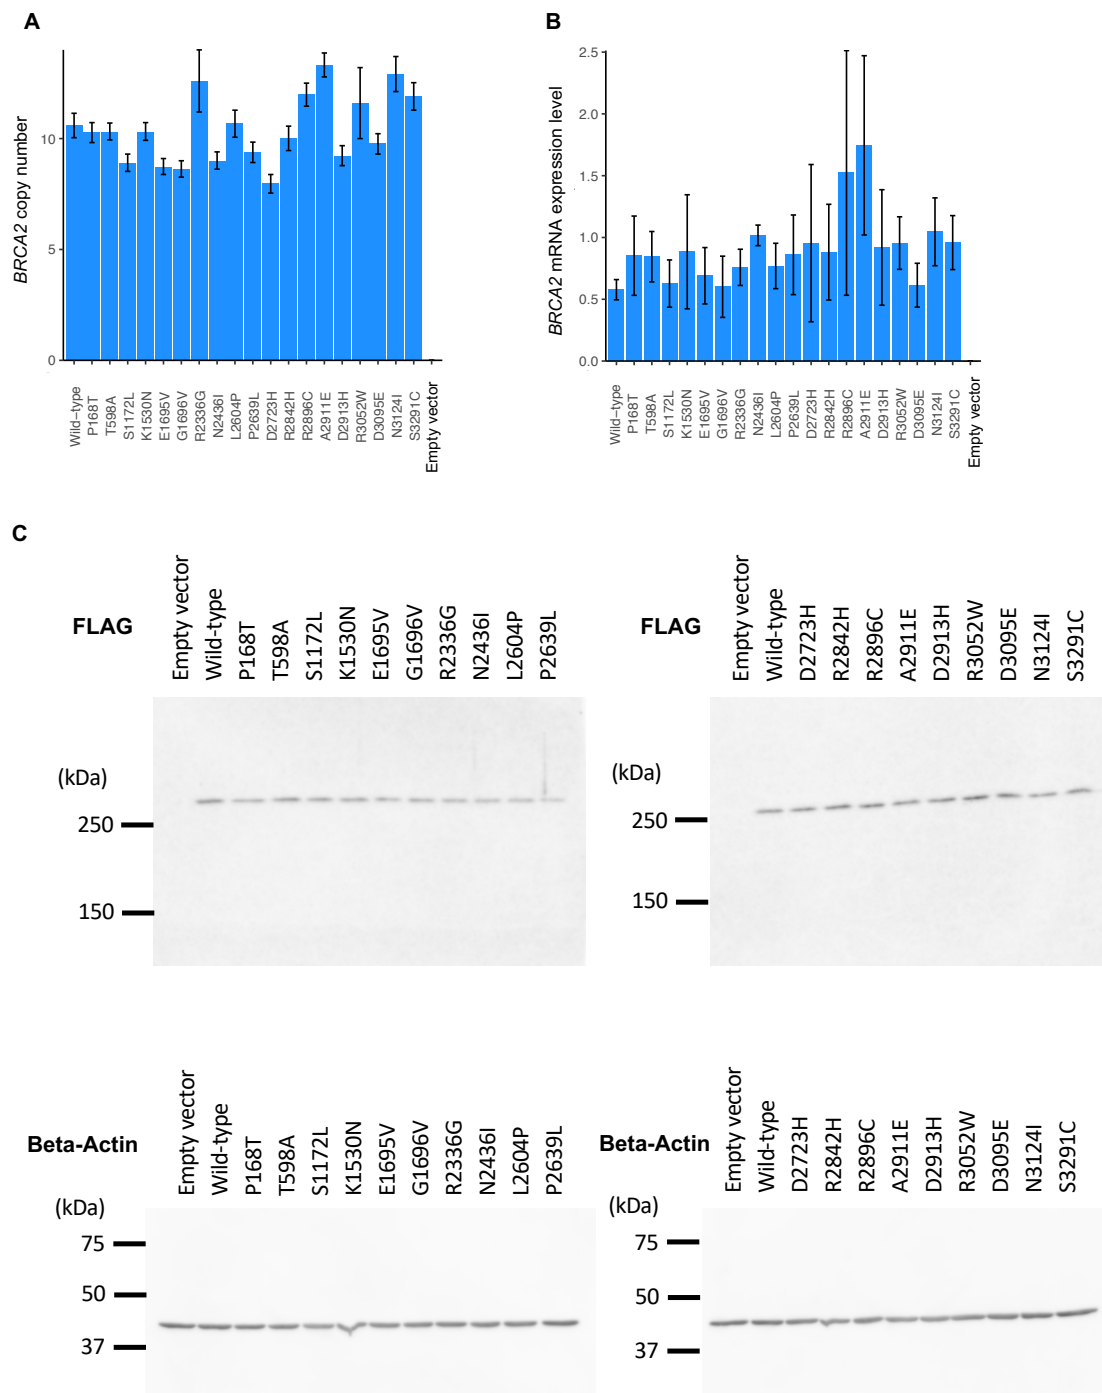

**Supplementary Figure 1:** Establishment of DLD1 *BRCA2* (-/-) cells expressing *BRCA2* variants. **A**, The induced *BRCA2* cDNA copy number of each variant was assessed by digital droplet PCR. Error bars, 95% confidence intervals. **B**, Real-time RT-PCR analysis of *BRCA2* mRNA expression in DLD1 parental cells and DLD1 *BRCA2* (-/-) cells. The *BRCA2* expression levels were normalized to those of ACTB and to those in DLD1 parental cells. Experiments

1024 were performed in technical triplicate. Data are shown as the average of biological triplicates.  
1025 No significant difference between variants was observed (Kruskal-Wallis rank sum test,  $p =$   
1026 0.37). Error bars, SD ( $n = 3$ ). C, Immunoblot analysis of DLD1 *BRCA2* (–/–) cells stably  
1027 expressing the FLAG-tagged *BRCA2* variants. Cell lysates prepared from each cell were  
1028 immunoblotted with antibodies against FLAG or beta-Actin. The protein expression levels of  
1029 the 19 *BRCA2* variants were generally equal to that of the wild-type *BRCA2*.

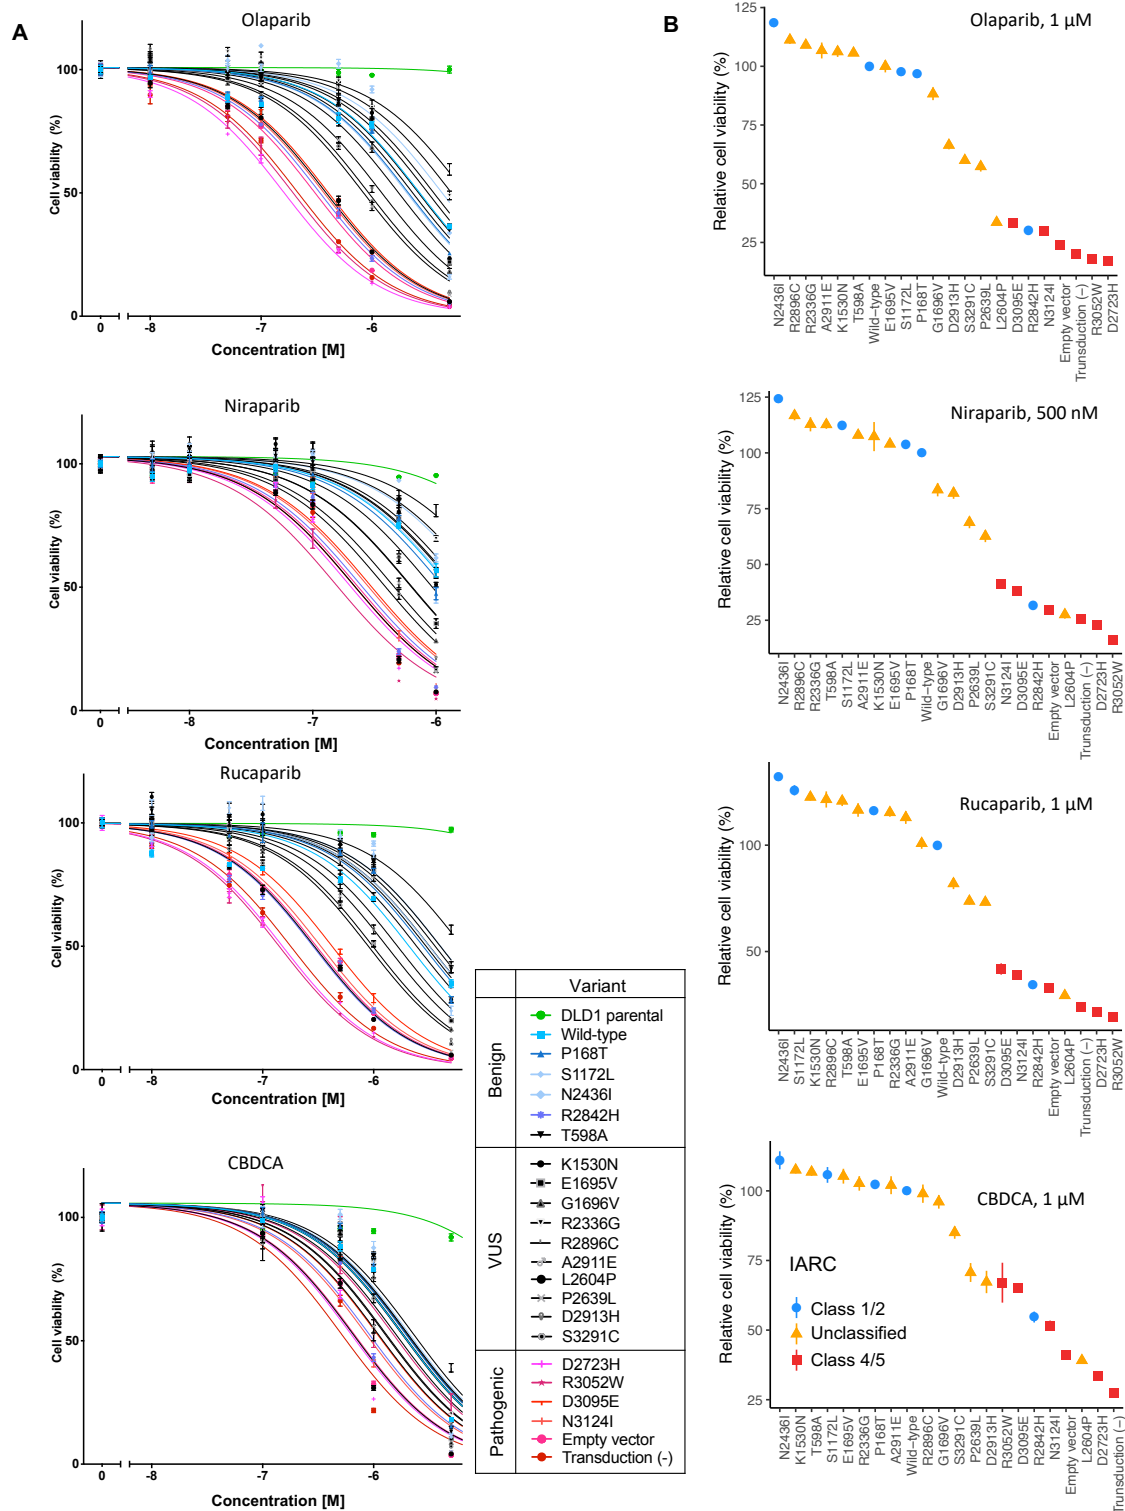

1030

Supplementary Figure 2: Sensitivities of cells harboring *BRCA2* variants to PARP inhibitors and CBDCA. DLD1 parental cells, DLD1 *BRCA2* (-/-) cells harboring cDNA for one of 20 *BRCA2* variants or empty vector, or untransduced DLD1 *BRCA2* (-/-) cells were treated with the indicated concentrations of drugs for 144 hours. **A**, Cell viability was measured using

1035 PrestoBlue cell viability reagent. The sensitivity to the drugs was in concordance with the  
 1036 IARC classification. IARC class 1/2 (benign), blue; unclassified (VUS), black; class 4/5  
 1037 (pathogenic), red. Error bars, SEM (n = 5). **B**, Relative viability of cells harboring *BRCA2*  
 1038 variants relative to those harboring the wild-type *BRCA2* with the indicated concentrations of  
 1039 drugs. The IARC classification of each variant is indicated by the color and shape of the lines  
 1040 and plots. Error bars, SEM (n = 5).

1041

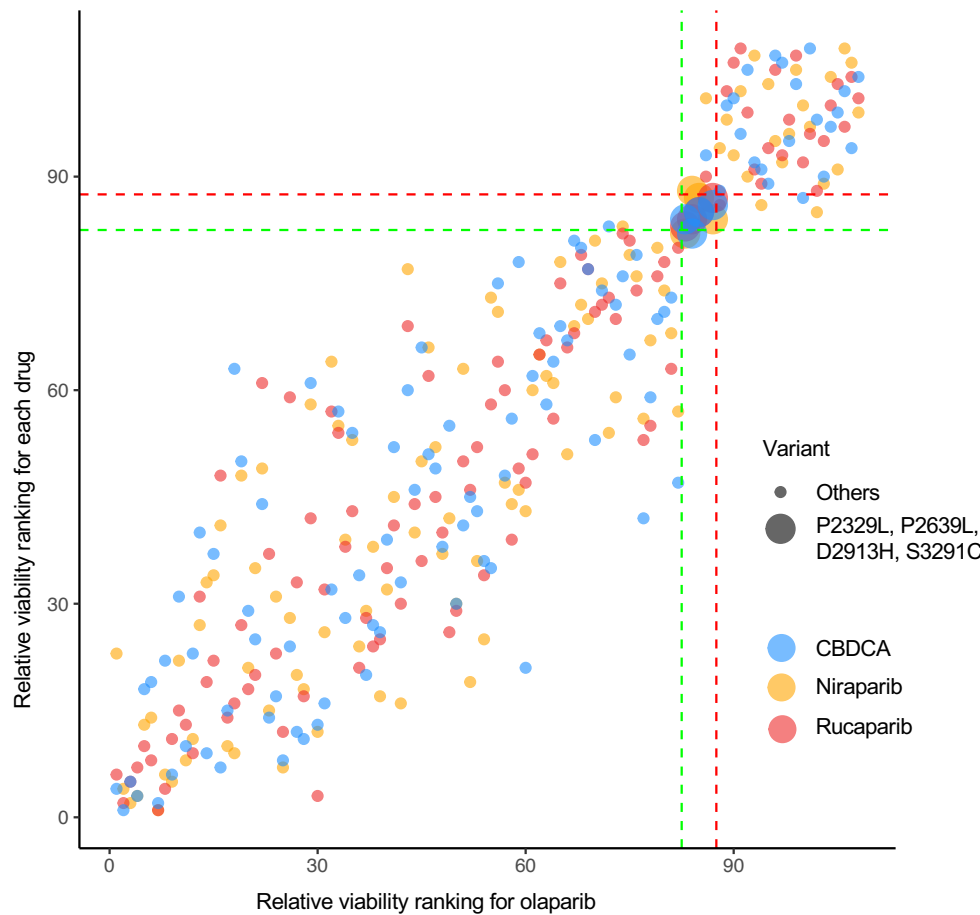

**Supplementary Figure 3:** Relative viability of the 107 *BRCA2* variants at the highest drug concentration by the MANO-B method. The relative viability of each variant for niraparib, rucaparib, and CBDCA are plotted against that for olaparib. Neutral variants showing a high relative viability are located in the lower left area, whereas deleterious variants are located in the upper right area. Three components are shown: neutral (relative viability of 1–82), intermediate (83–87), and deleterious (88–108). P2329L, P2639L, D2913H, and S3291C, thought to be intermediate variants, are represented by larger circles.



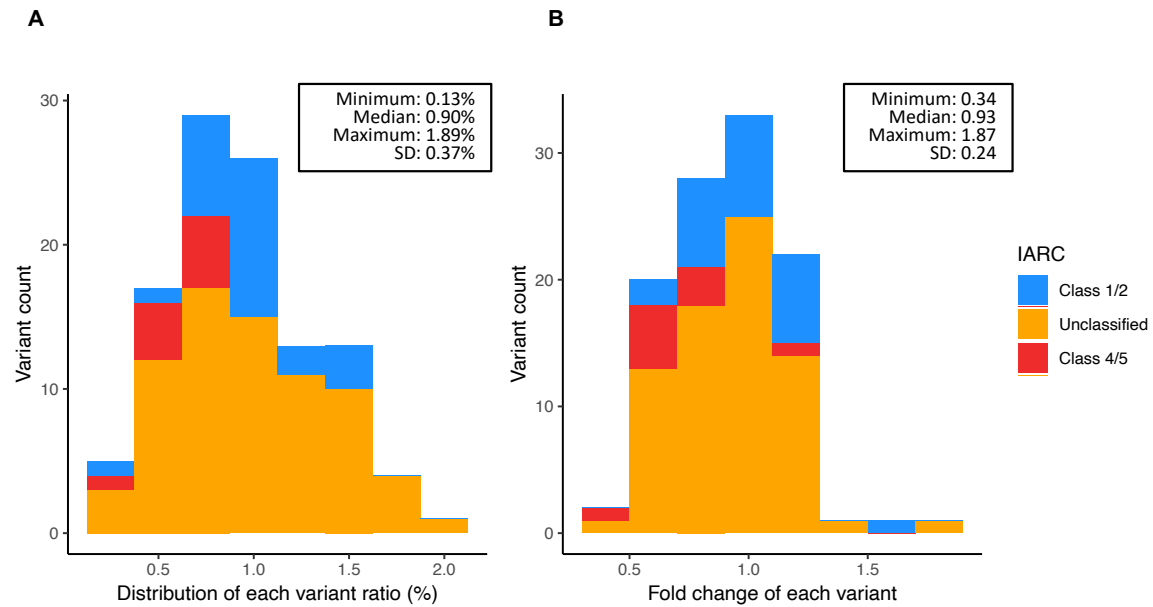

**Supplementary Figure 4:** Histograms of variant distribution in a batch of the MANO-B method. **A**, The distribution of each variant ratio at day 0 is shown. **B**, The fold change of each variant from day 0 to day 12 with DMSO treatment is shown. SD, standard deviation.

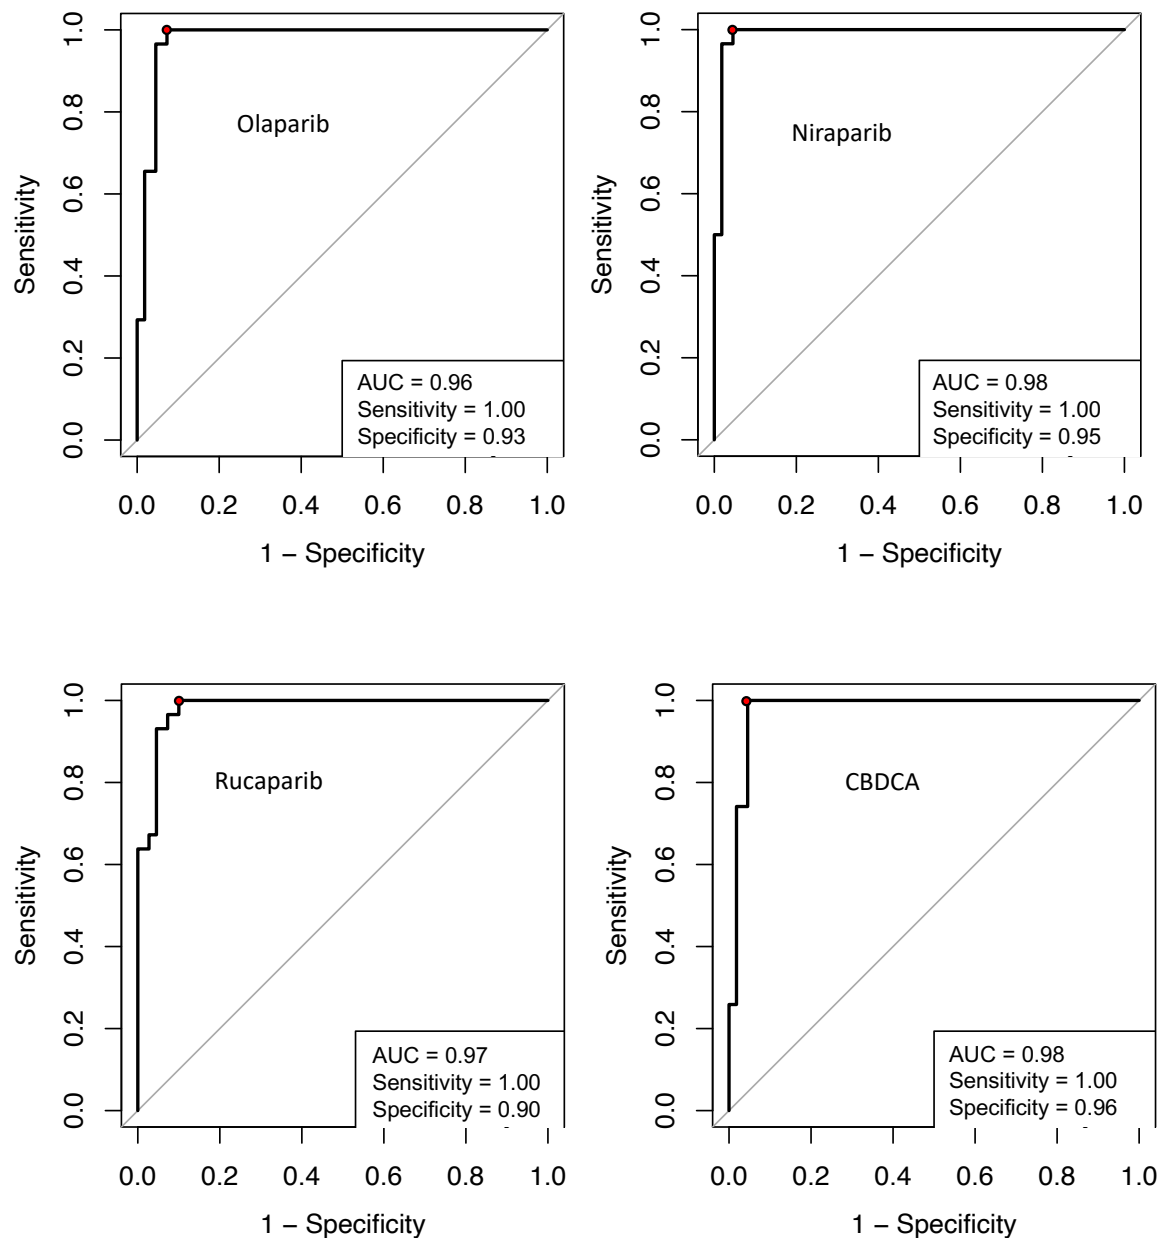

**Supplementary Figure 5:** ROC curves for data obtained from 37 known benign and 22 known pathogenic *BRCA2* variants. All established benign (IARC class 1/2) and pathogenic (IARC class 4/5) variants were extracted from the 244 variants. Potential hypomorphic variants, R2784Q, R2842H, and G2908V, were classified as pathogenic at the indicated threshold, and all other variants were correctly classified.

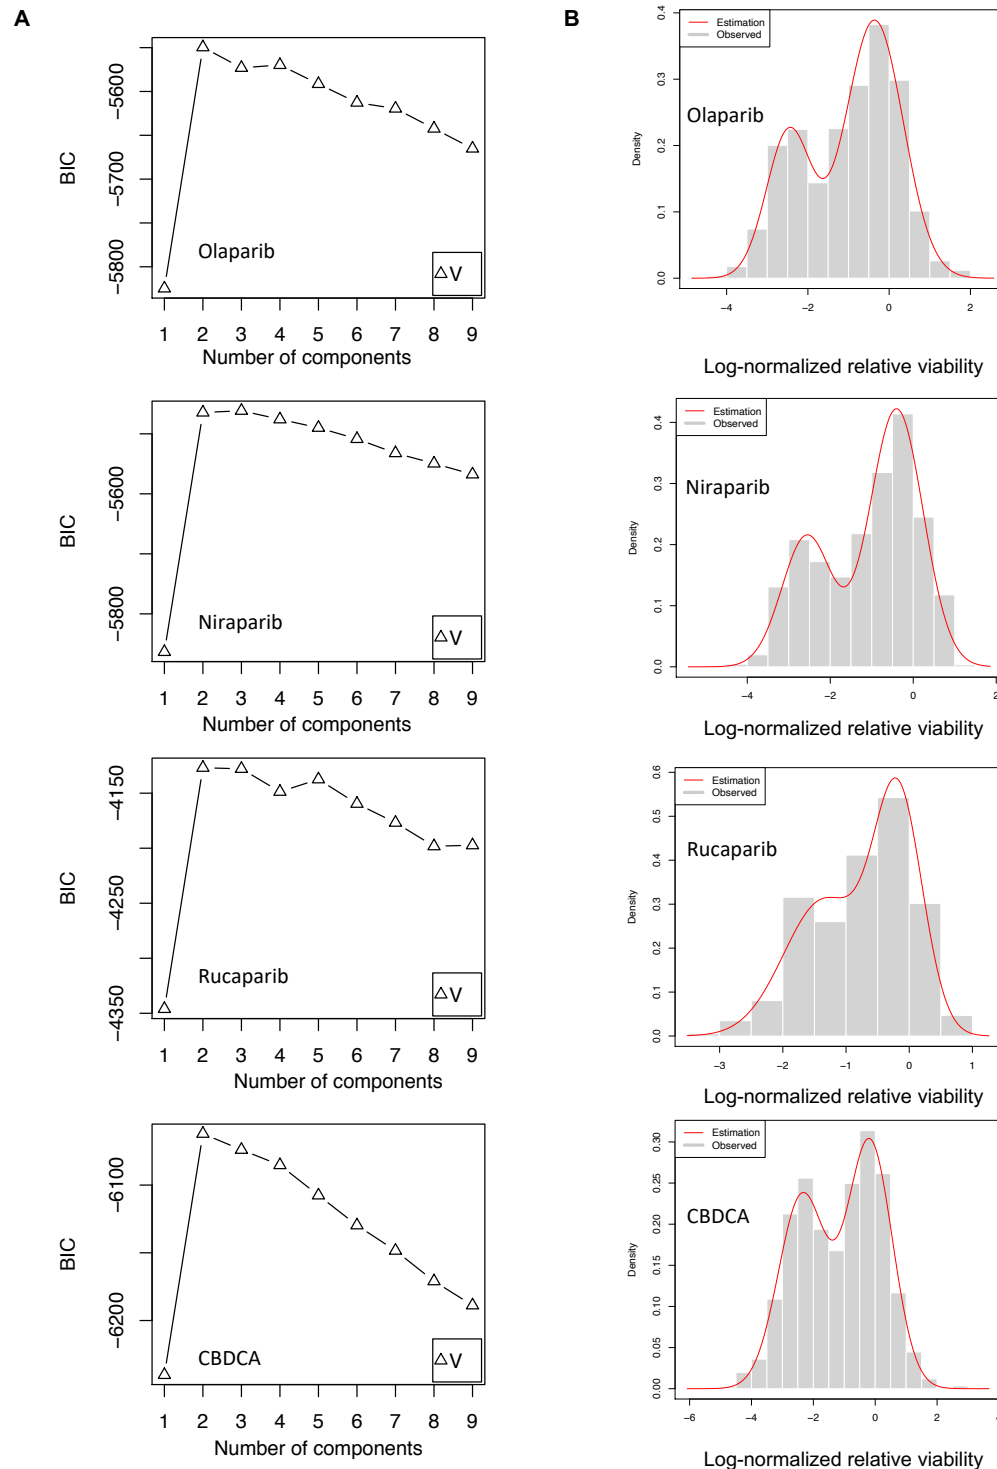

**Supplementary Figure 6:** Model estimation for data obtained from 244 *BRCA2* variants and an empty vector. **A**, Expectation–maximization algorithm to determine the appropriate model for the data. According to the Bayesian information criterion (BIC), a two-component Gaussian mixture model was the appropriate model. **B**, The estimated two-component Gaussian mixture

1066 distribution density curve (red line) fit the distribution of the observed log-normalized relative  
1067 viability data. The left component corresponds to deleterious variants, whereas the right  
1068 component corresponds to neutral variants.

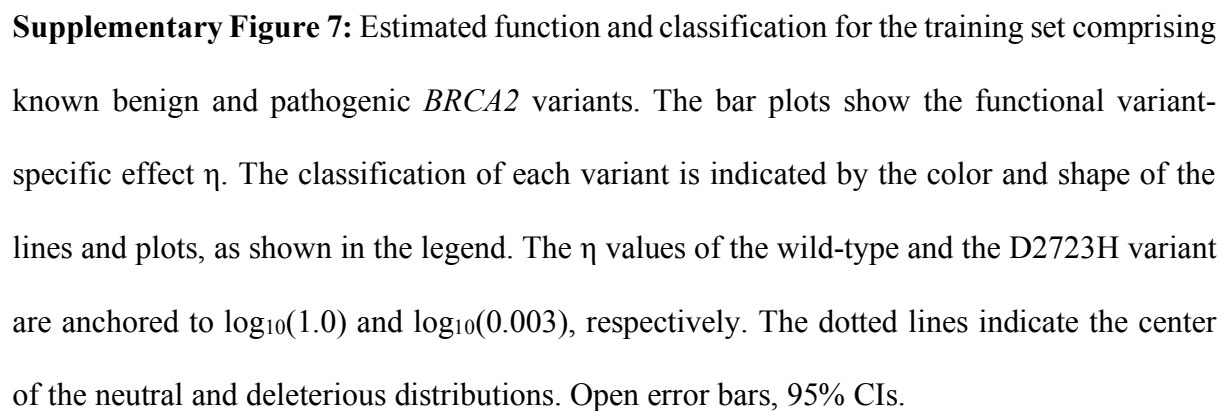

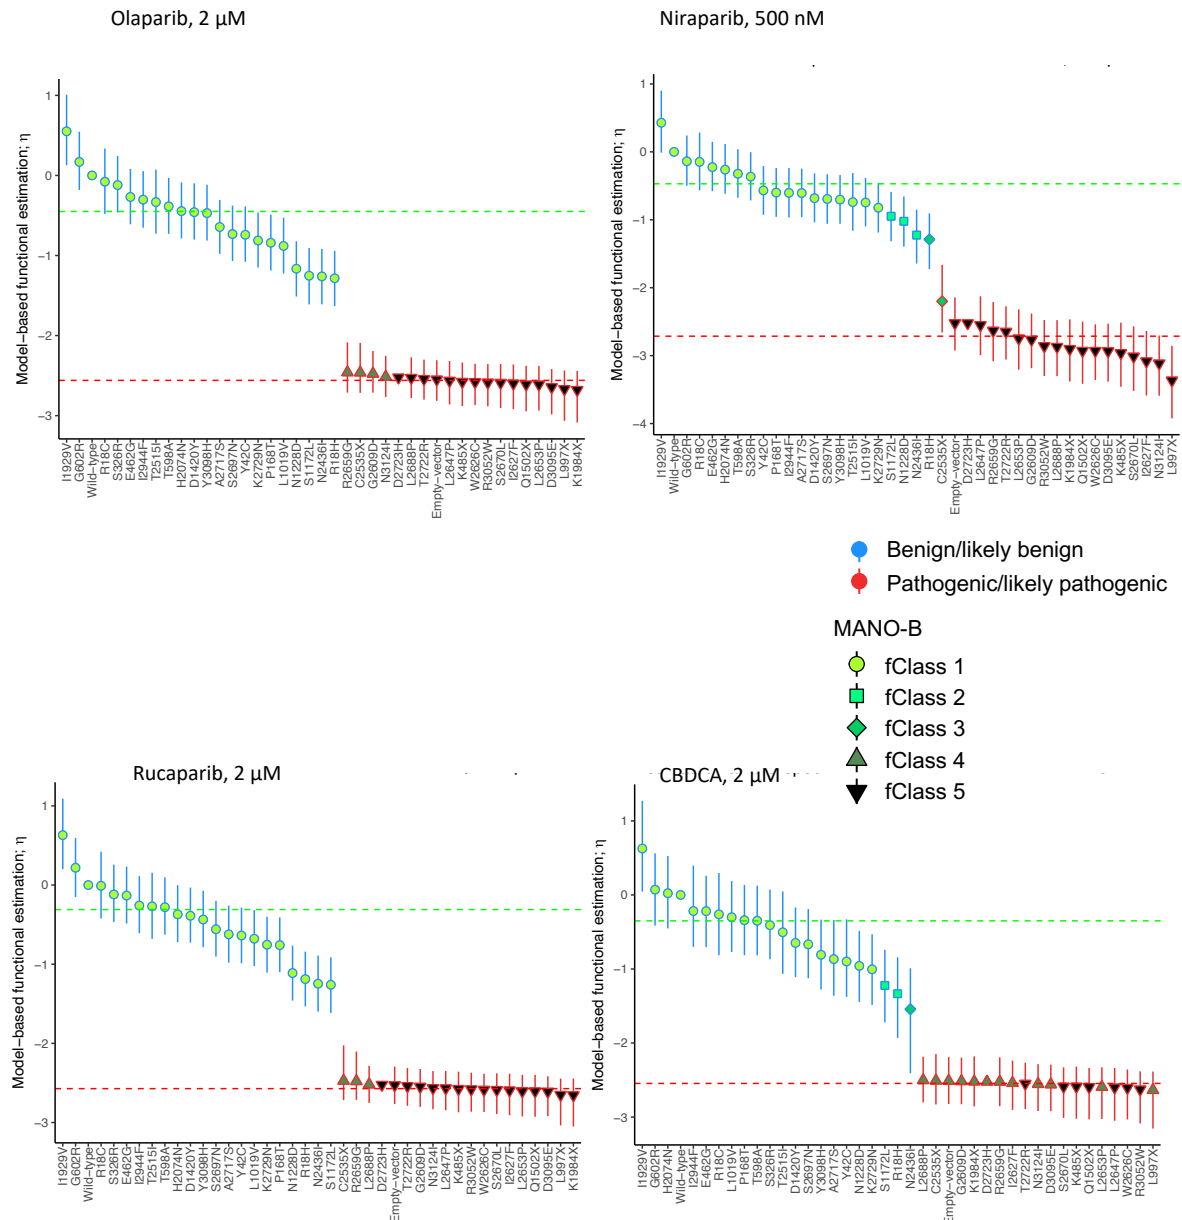

**Supplementary Figure 8:** Estimated function and classification for all the established benign and pathogenic *BRCA2* variants defined by the ACMG guidelines criteria. The barplots show the functional variant-specific effect  $\eta$ . The classification of each variant is indicated by the color and shape of the lines and plots, as shown in the legend. The  $\eta$  values of the wild-type and the D2723H variant are anchored to  $\log_{10}(1.0)$  and  $\log_{10}(0.003)$ , respectively. The dotted lines indicate the center of the neutral and deleterious distributions. Open error bars, 95% CIs.

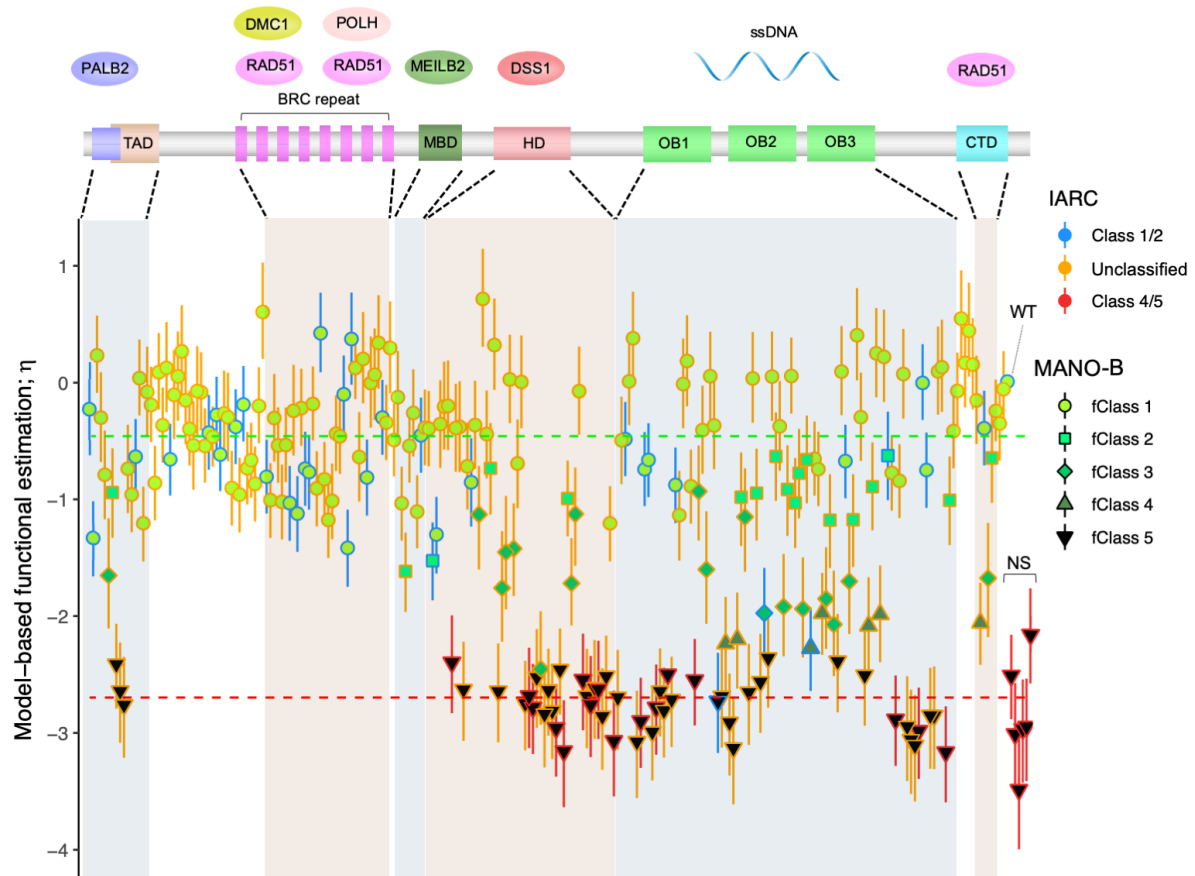

**Supplementary Figure 9:** Bar plots of functional variant effects and functional diagnosis of 244 *BRCA2* variants analyzed with Align-GVGD-based prior probability. The bar plots show the functional variant-specific effect  $\eta$ . Bayesian inference was performed with prior probability values according to the Align-GVGD algorithm. The classification of each variant is indicated by the color and shape of the lines and plots, as shown in the legend. The  $\eta_v$  values of the wild-type and the D2723H variant are anchored to  $\log_{10}(1.0)$  and  $\log_{10}(0.003)$ , respectively. Dotted lines indicate the median value of the neutral and deleterious distributions. Open error bars, 95% CIs. WT, wild-type; NS, nonsense variants.

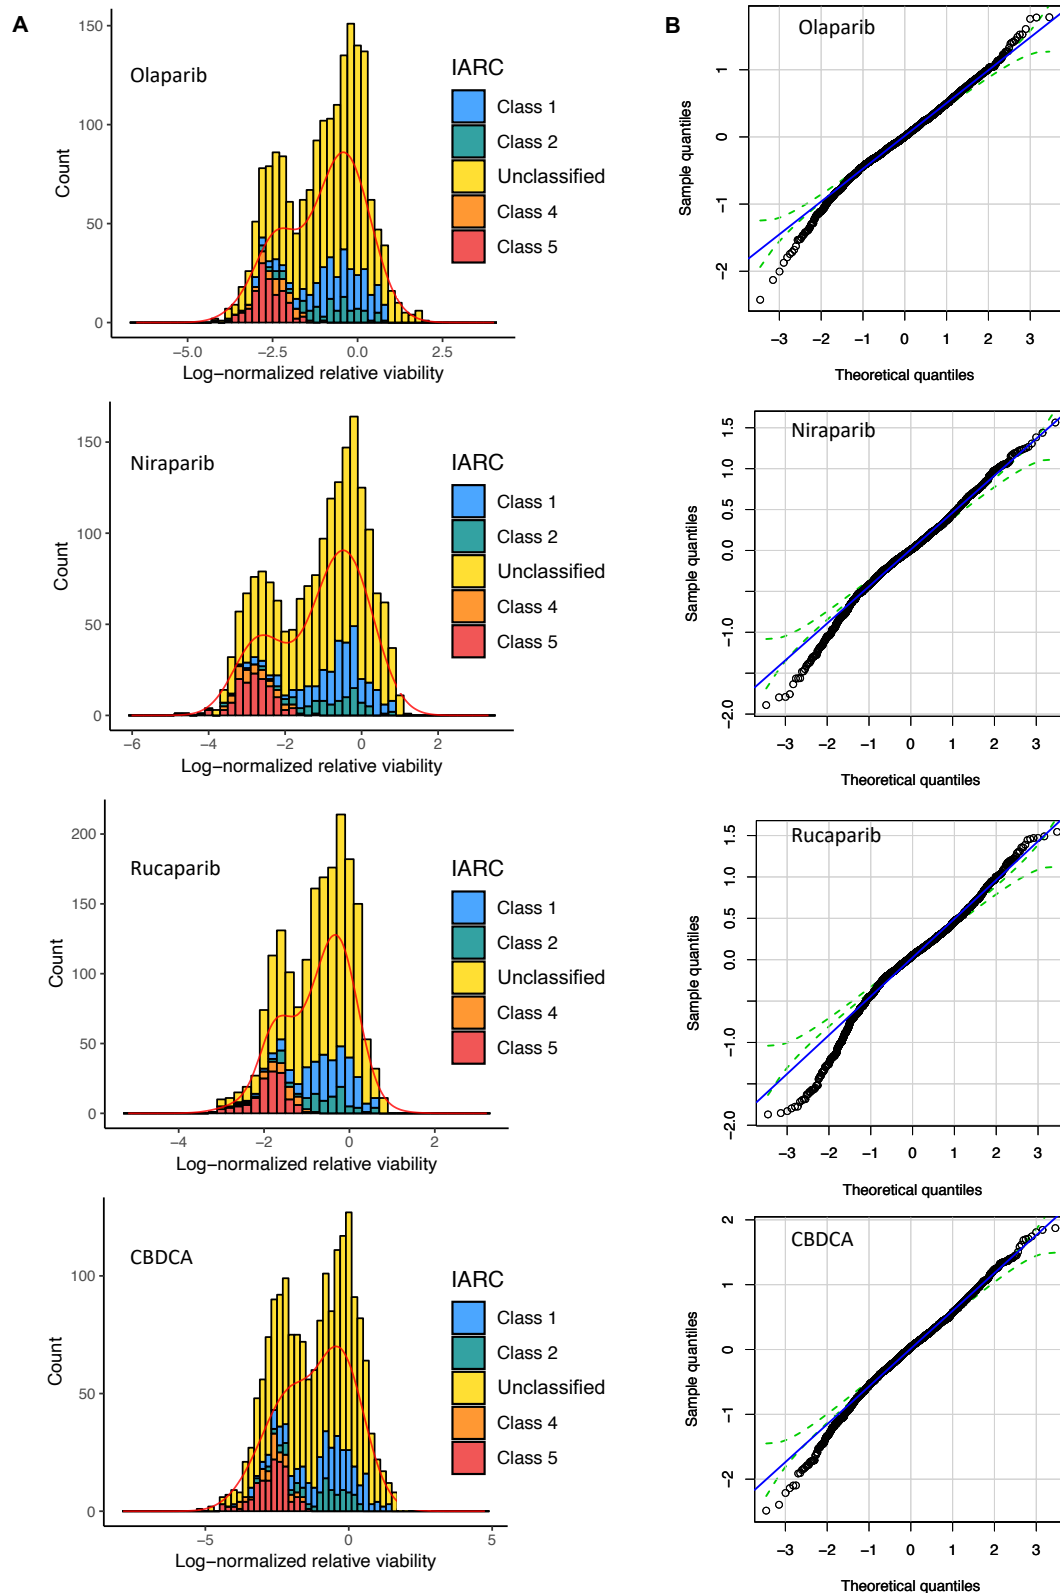

**Supplementary Figure 10: Posterior predictive checks of model parameters. A,** Posterior predictive density curves of the log-normalized relative viability values for the 244 variants fit



1097 to the histogram of observed data. **B**, Normal Q-Q plots of the expected standardized residuals  
1098 of the log-normalized relative viability.

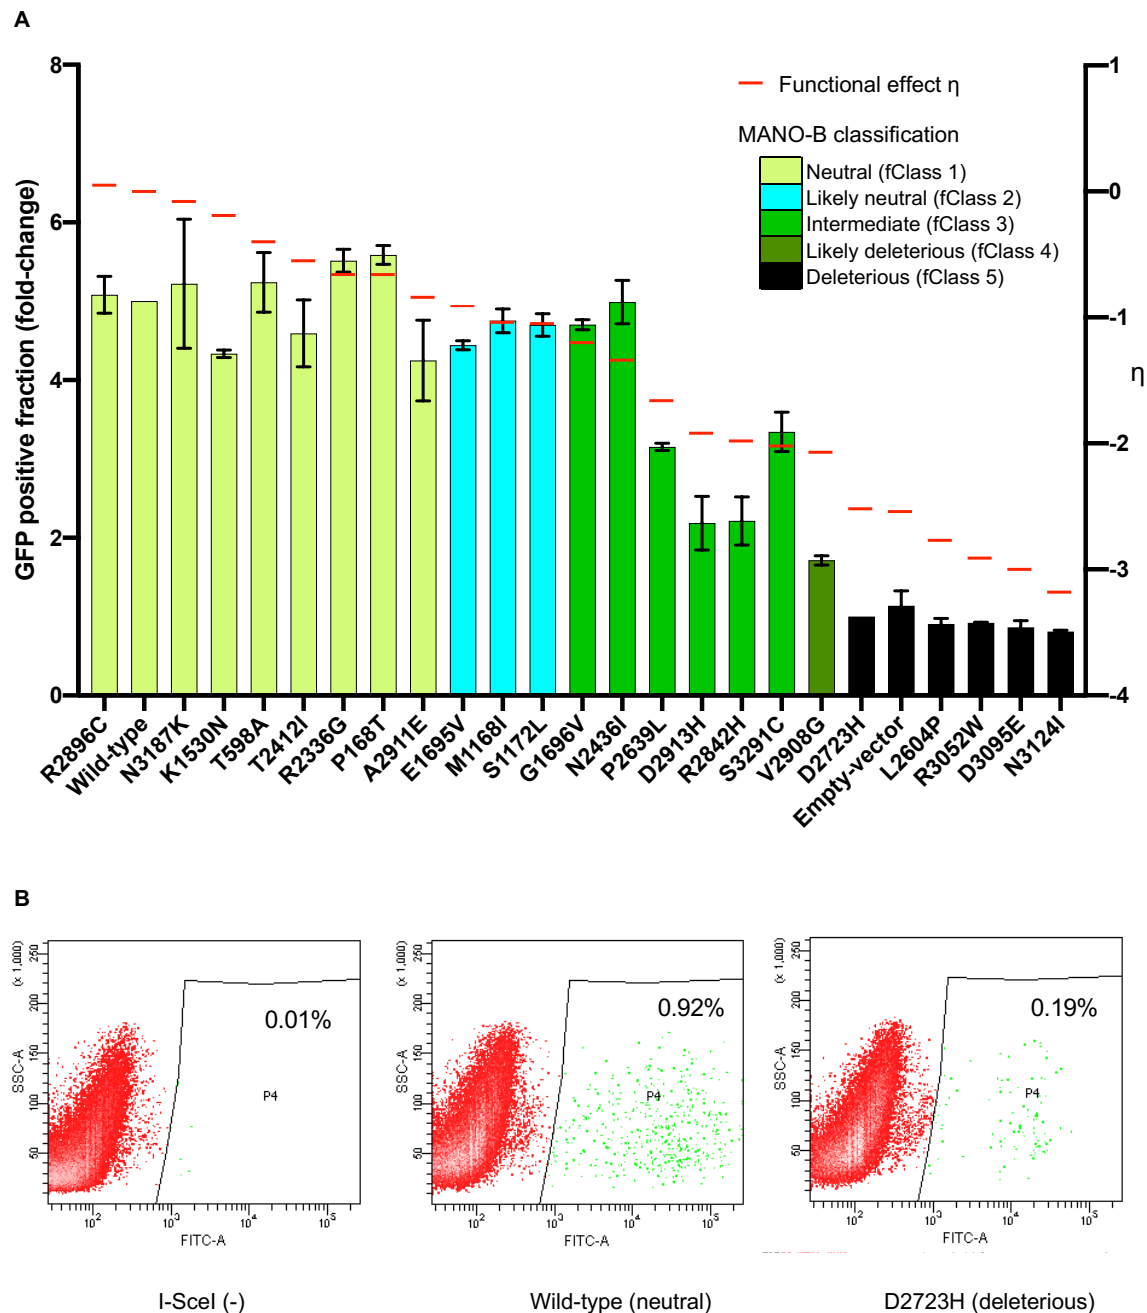

**Supplementary Figure 11: Homology-directed repair assay of 24 *BRCA2* variants. A,**  
MANO-B classifications exhibited good correlation with the results of the HDR assay.  
*BRCA2* variant expression vectors and an I-SceI expression vector were cotransfected into  
DLD1 *BRCA2* ( $-/-$ ) cells harboring the DRGFP sequence, and GFP-positive cells were  
counted by FACS 4 d after transfection. The GFP-positive fraction was normalized and  
rescaled relative to a 1:5 ratio of D2723H:wild-type. All variants were analyzed in biological

1106 duplicate and technical triplicate. The colors of the bar graphs indicate the MANO-B  
 1107 classification of each variant. The heights of the bar graphs indicate the GFP-positive  
 1108 fractions (HDR assay). Red lines show the functional effects of each variant ( $\eta_v$ ). Error bars,  
 1109 s.d. ( $n = 2$ );  $\eta_v$ , functional variant-specific effect. **B**, Gating for GFP-positive cells.

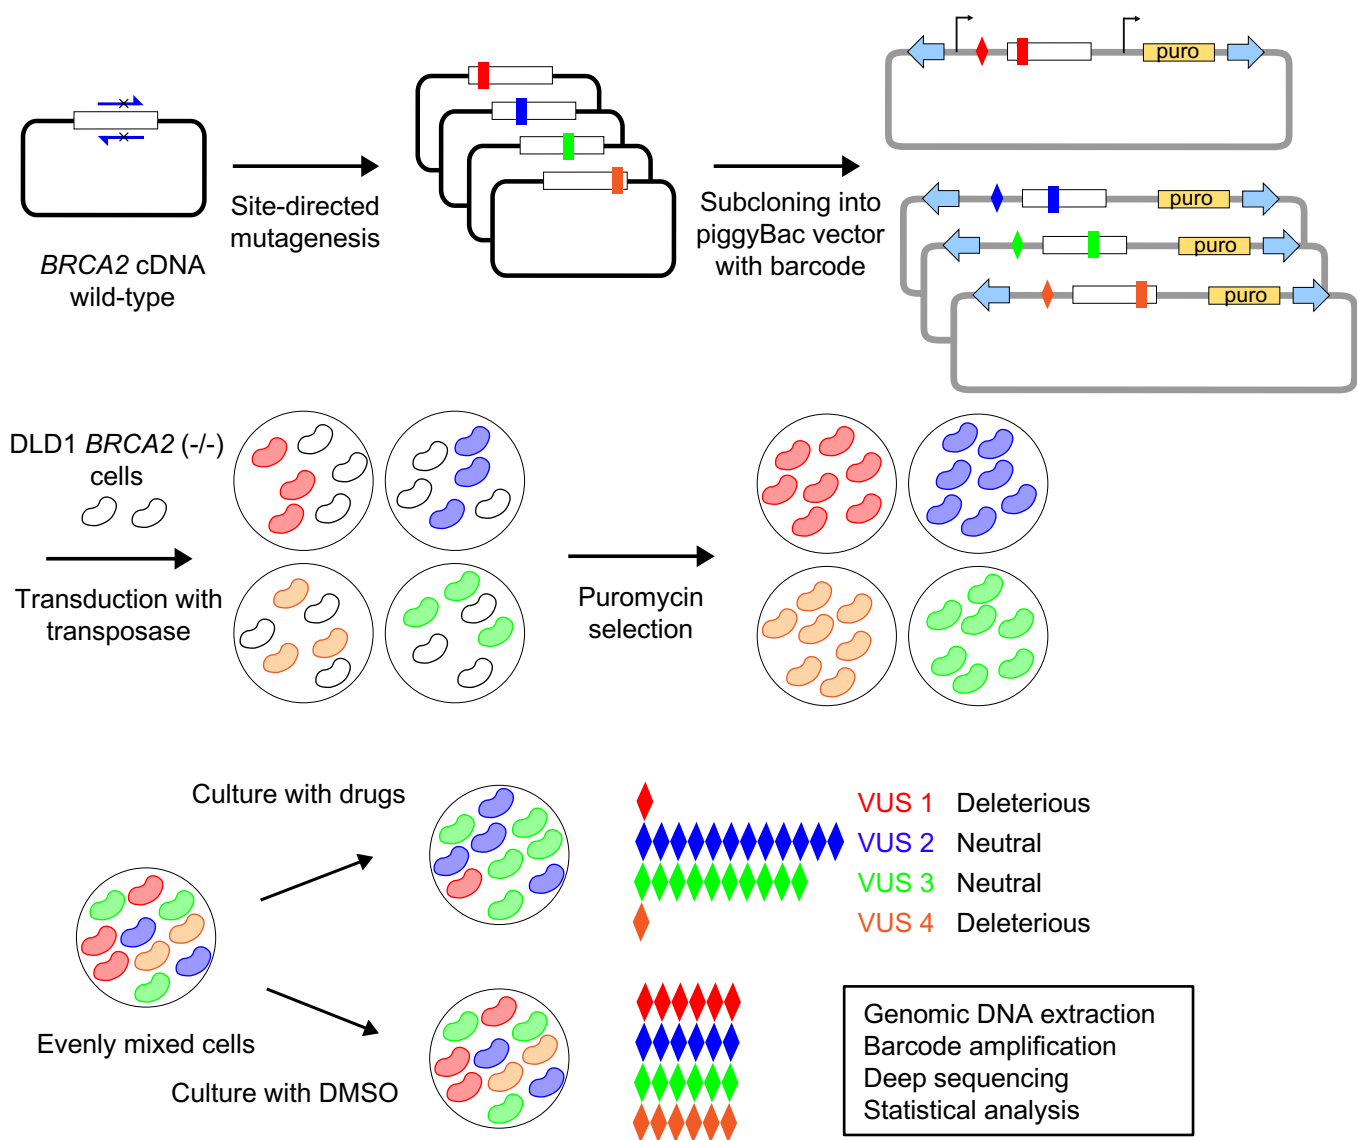

**Figure 1.**

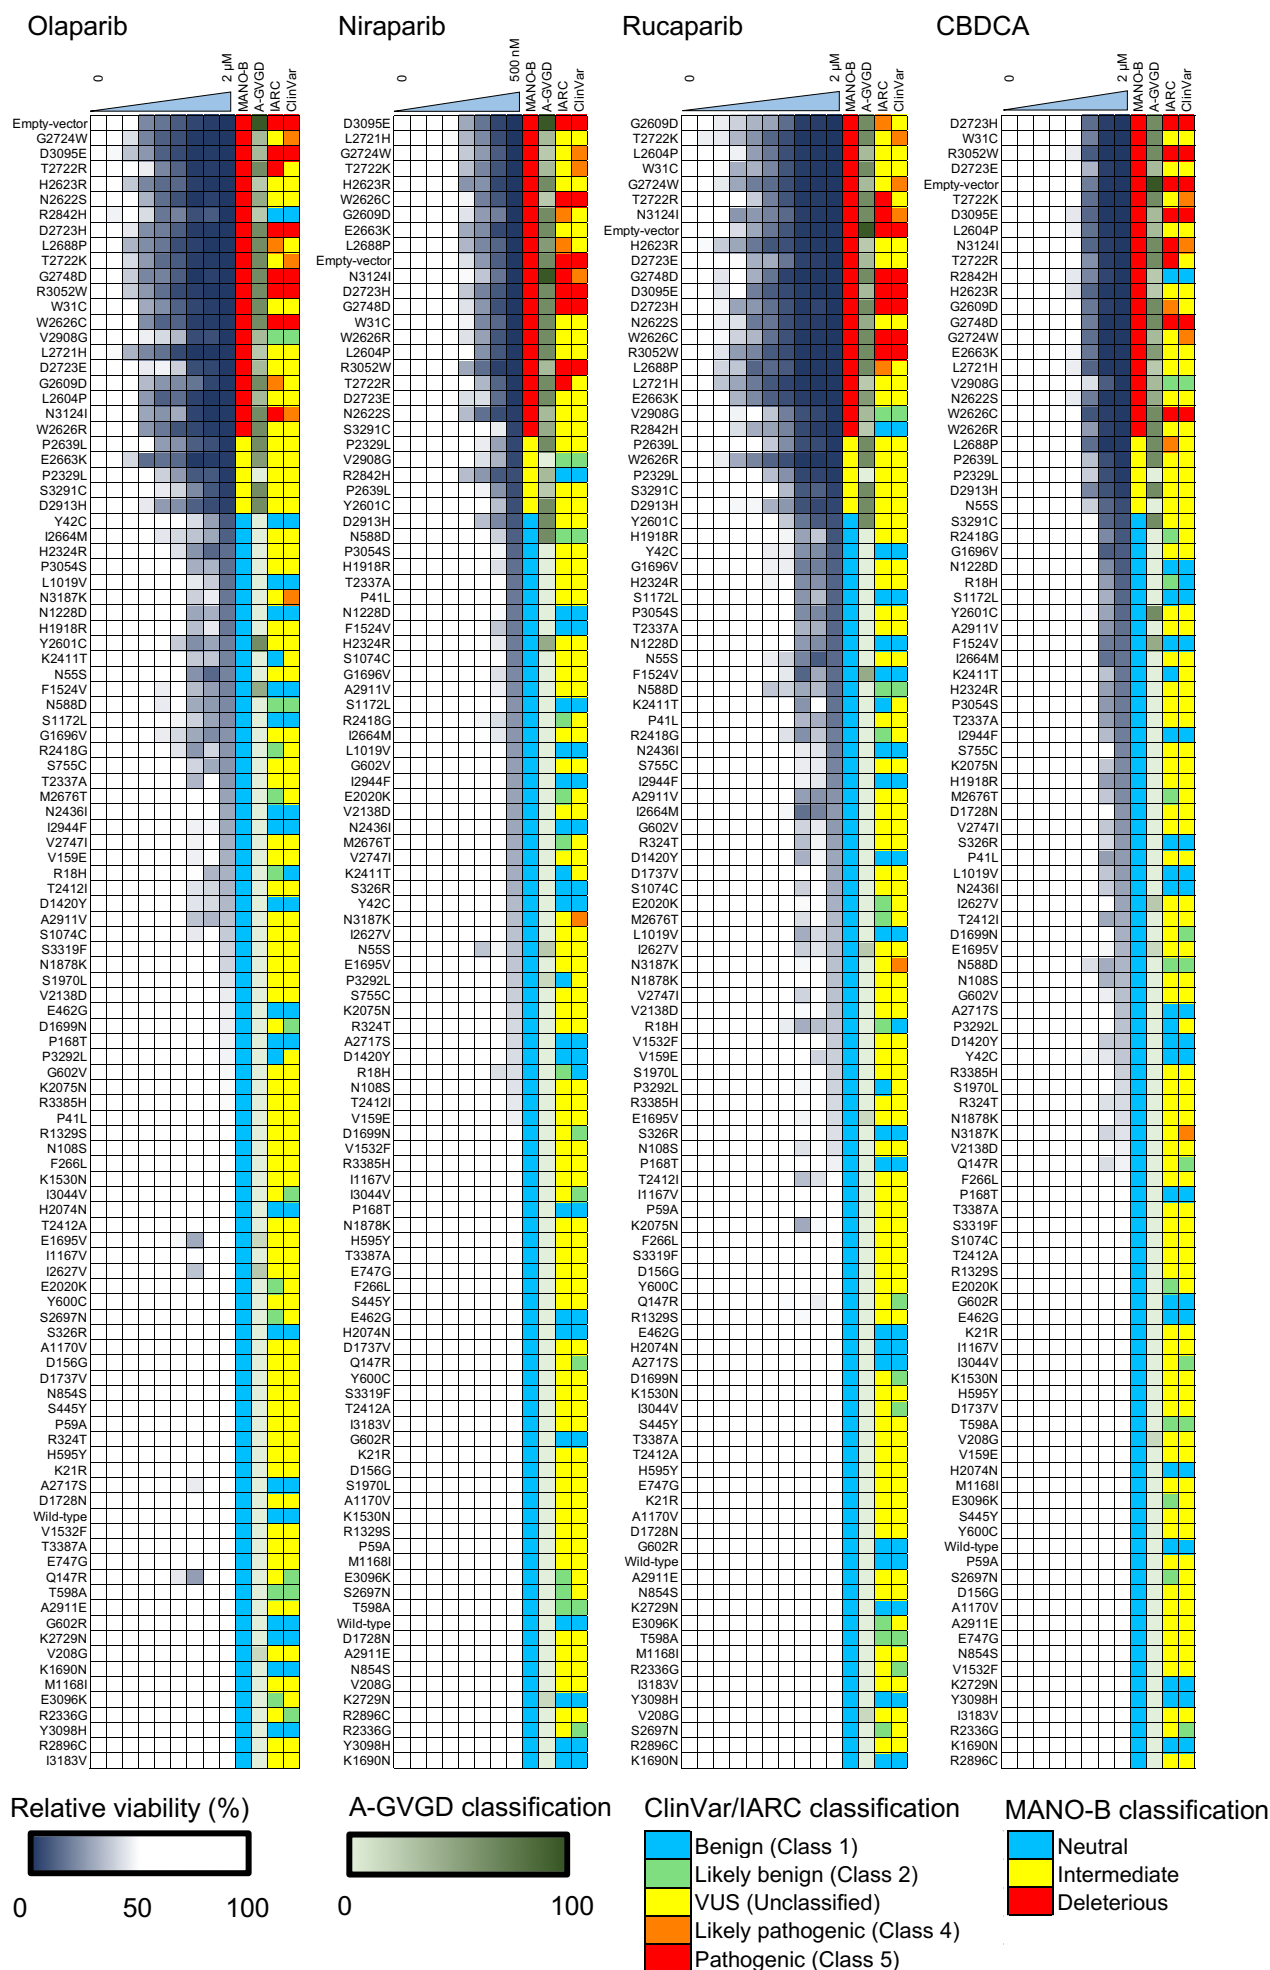

**Figure 2.**

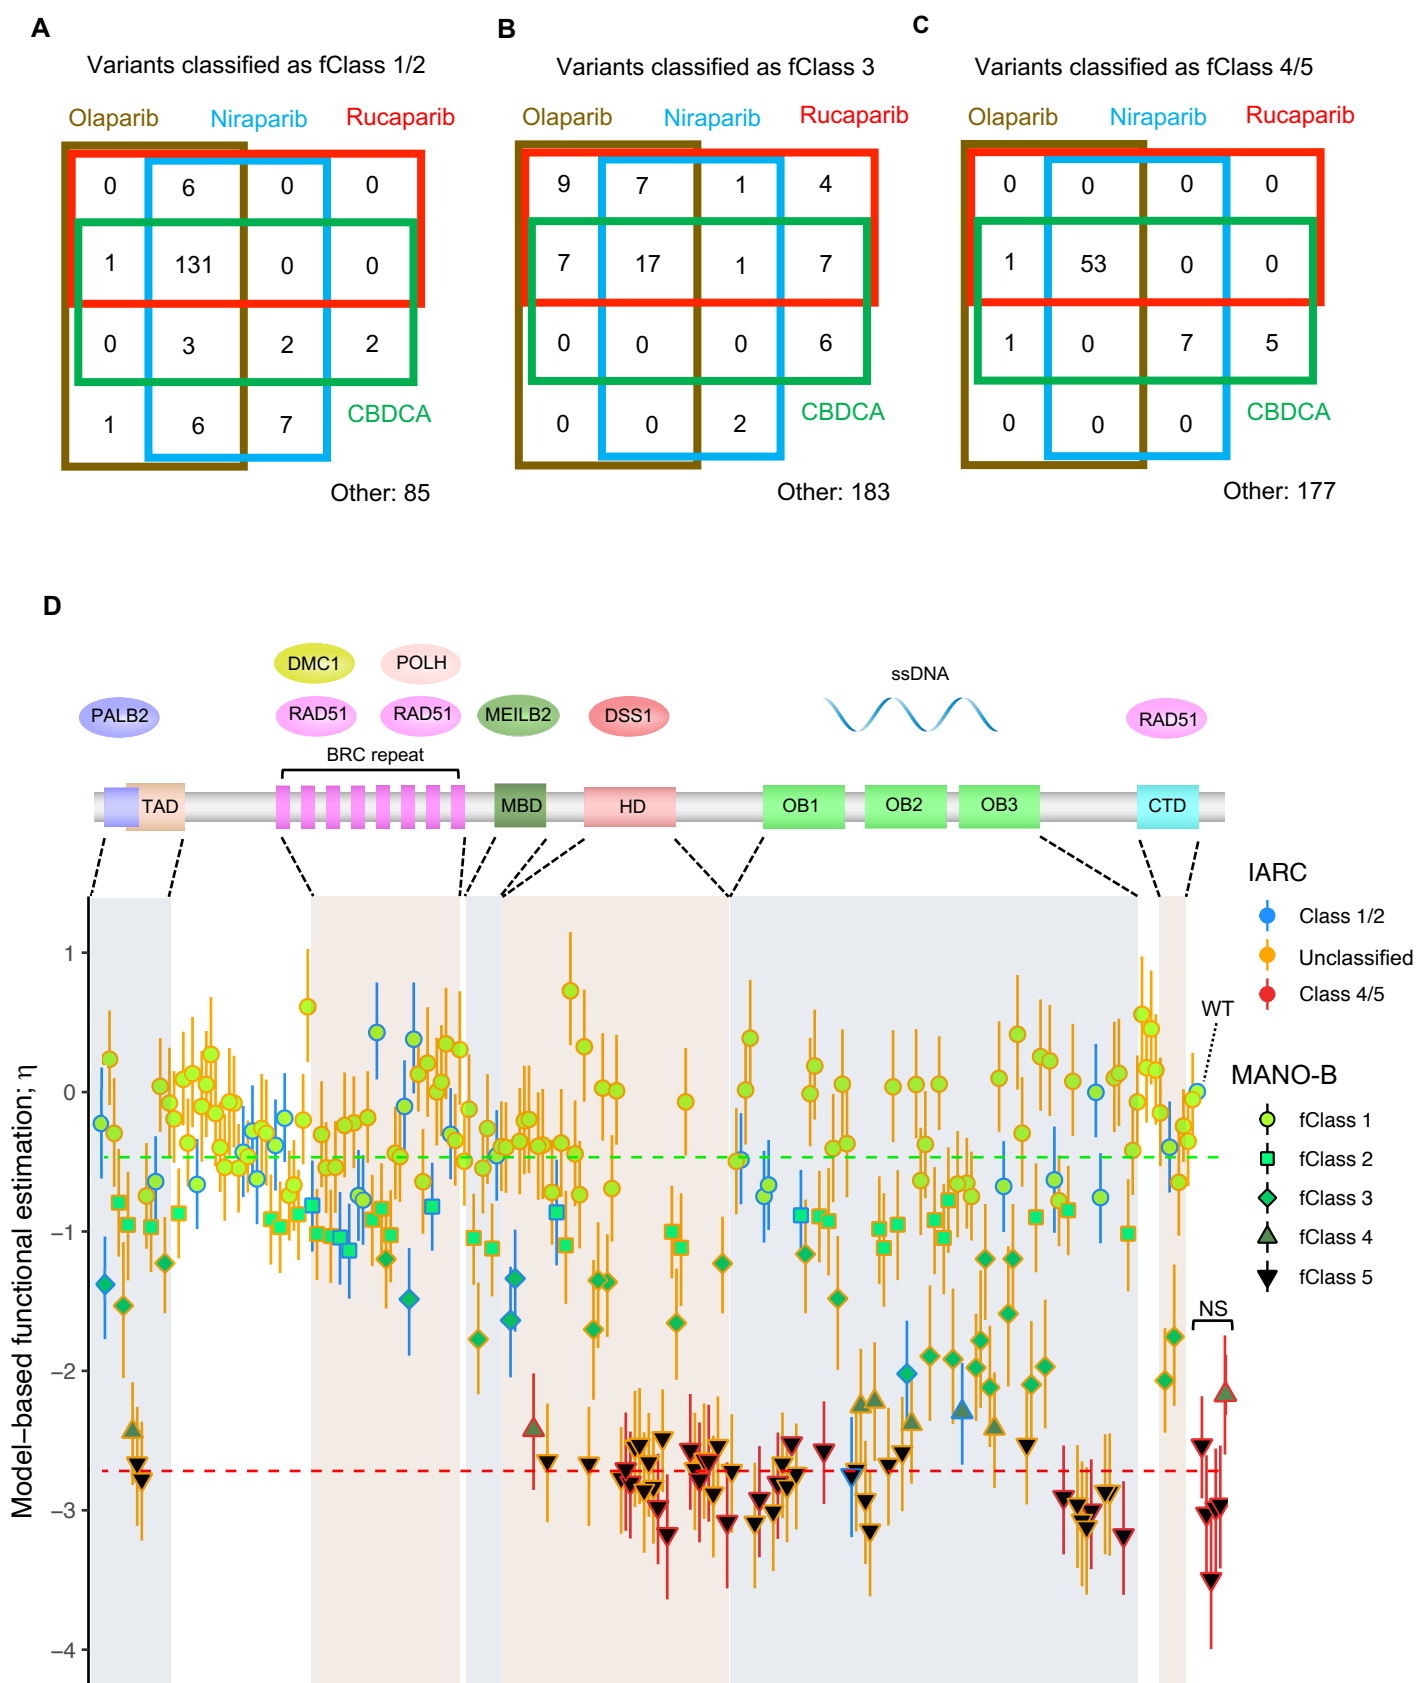

**Figure 3.**

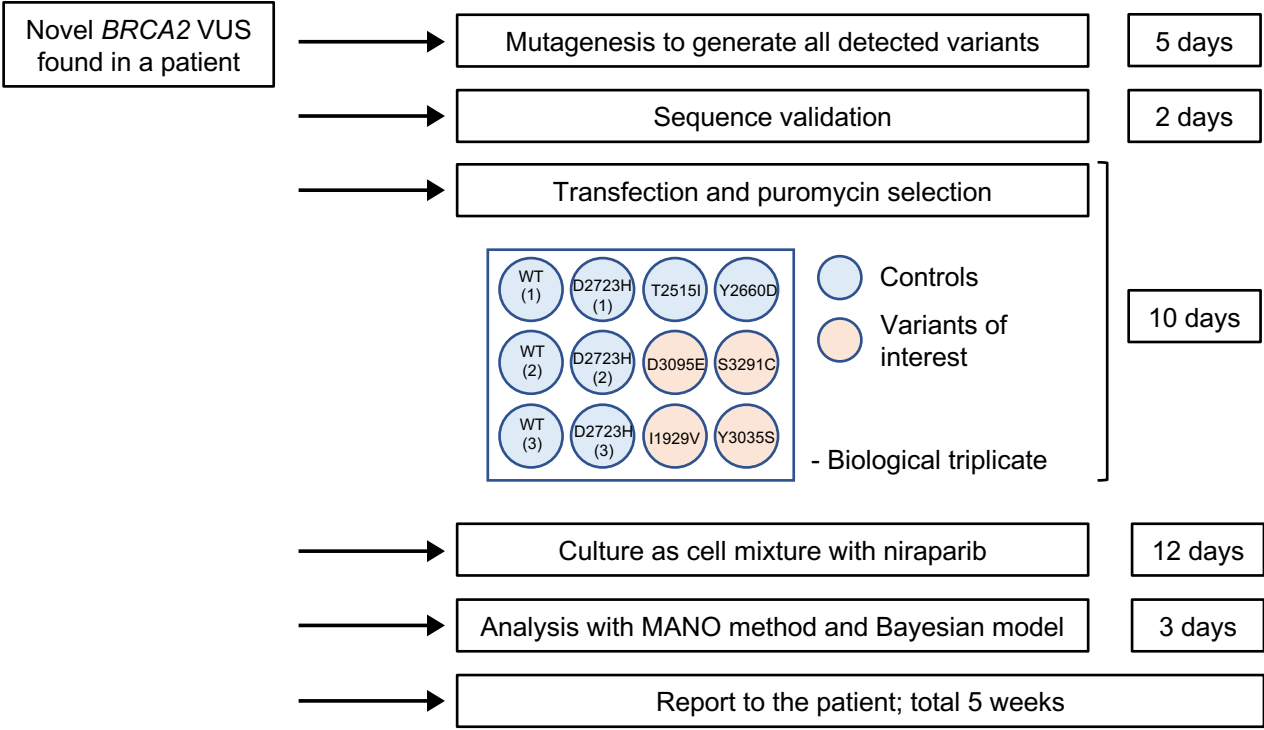

Figure 4.

Table 1. Results of an experimental ABCD test.

|         |                     |                    | $\eta$ |        |       |                     |          |
|---------|---------------------|--------------------|--------|--------|-------|---------------------|----------|
|         |                     |                    |        | 95% CI |       |                     |          |
| Variant | IARC classification | ABCD test          | Mean   | LL     | UL    | BF                  | fClass   |
| I1929V  | Class 1             | Previous batches   | 0.37   | -0.02  | 0.79  | $1.05\times10^{-5}$ | fClass 1 |
|         |                     | New batch-1        | 0.19   | -0.33  | 0.73  | $1.02\times10^{-5}$ | fClass 1 |
|         |                     | New batch-2        | -0.23  | -0.73  | 0.28  | $1.63\times10^{-4}$ | fClass 1 |
|         |                     | New batch-3        | 0.08   | -0.43  | 0.6   | $3.71\times10^{-5}$ | fClass 1 |
|         |                     | 3 batches combined | 0.11   | -0.23  | 0.44  | $1.40\times10^{-5}$ | fClass 1 |
| Y3035S  | Class 2             | Previous batches   | -0.63  | -1.01  | -0.25 | $1.11\times10^{-3}$ | fClass 1 |
|         |                     | New batch-1        | -0.55  | -1.05  | -0.04 | $1.12\times10^{-3}$ | fClass 1 |
|         |                     | New batch-2        | -0.53  | -1.04  | -0.02 | $9.57\times10^{-4}$ | fClass 1 |
|         |                     | New batch-3        | -0.36  | -0.87  | 0.16  | $3.01\times10^{-4}$ | fClass 1 |
|         |                     | 3 batches combined | -0.47  | -0.79  | -0.15 | $2.79\times10^{-4}$ | fClass 1 |
| D3095E  | Class 5             | Previous batches   | -3     | -3.41  | -2.62 | $1.33\times10^4$    | fClass 5 |
|         |                     | New batch-1        | -2.31  | -2.8   | -1.78 | $4.45\times10^1$    | fClass 4 |
|         |                     | New batch-2        | -2.63  | -3.12  | -2.15 | $5.75\times10^2$    | fClass 5 |
|         |                     | New batch-3        | -2.69  | -3.2   | -2.19 | $9.28\times10^2$    | fClass 5 |
|         |                     | 3 batches combined | -2.52  | -2.85  | -2.19 | $7.85\times10^2$    | fClass 5 |
| S3291C  | Unclassified        | Previous batches   | -2.07  | -2.43  | -1.69 | $1.15\times10^1$    | fClass 3 |
|         |                     | New batch-1        | -1.06  | -1.7   | -0.53 | $6.15\times10^{-2}$ | fClass 3 |
|         |                     | New batch-2        | -2.06  | -2.6   | -1.34 | $7.05\times10^0$    | fClass 3 |
|         |                     | New batch-3        | -1.35  | -2.12  | -0.74 | $3.17\times10^{-1}$ | fClass 3 |
|         |                     | 3 batches combined | -1.46  | -1.86  | -1.11 | $3.39\times10^{-1}$ | fClass 3 |

BF, Bayes factor; LL, lower limit; UL, upper limit; CI, credible interval.
